1  
2  
3  
4  
5  
6  
7  
8  
9  
10  
11  
12  
13  
14  
15  
16  
17  
18  
19  
20  
21  
22  
23  
24  
25  
26  
27  
28

**Children Developing Celiac Disease Have a Distinct and Proinflammatory Gut  
Microbiota in the First 5 Years of Life**

**Qian Huang<sup>1</sup>, Yi Yang<sup>2</sup>, Vladimir Tolstikov<sup>3</sup>, Michael A. Kiebish<sup>3</sup>, Jonas F  
Ludvigsson<sup>4,5</sup>, Noah W. Palm<sup>2</sup>, Johnny Ludvigsson<sup>6</sup>, Emrah Altindis<sup>1</sup>**

**Affiliations:**

<sup>1</sup> Boston College Biology Department, Chestnut Hill, MA 02467, USA

<sup>2</sup> Department of Immunobiology, Yale University School of Medicine, New Haven, CT  
06510, USA.

<sup>3</sup> BERG, LLC, Framingham, MA, USA.

<sup>4</sup> Department of Medical Epidemiology and Biostatistics, Karolinska Institutet,  
Stockholm, Sweden

<sup>5</sup> Department of Paediatrics, Örebro University Hospital, Sweden

<sup>6</sup> Crown Princess Victoria's Children's Hospital, Region Östergötland, Division of  
Pediatrics, Linköping University, Linköping, SE 58185, Sweden.

**Correspondence to:** Emrah Altindis, Boston College Biology Department, Higgins Hall,  
140 Commonwealth Avenue Chestnut Hill, MA 02467. E-mail: [altindis@bc.edu](mailto:altindis@bc.edu)

29 **ABSTRACT**

30 **Objective:** Celiac disease (CD) is an immune-mediated disease characterized by small intestinal  
31 inflammation. CD is associated with HLA-DQ2 and HLA-DQ8 haplotypes, however, genetics  
32 alone cannot explain the increasing incidence rates. The main goal of this study was to determine  
33 the role of the gut microbiota in CD pathogenesis in the first five years of life.

34 **Design:** We conducted a longitudinal study focusing on three developmental phases of the gut  
35 microbiota (ages 1, 2.5 and 5 years). The fecal samples were obtained from 16 children who  
36 developed CD and 16 matched controls. We used 16S sequencing combined with functional  
37 analysis, flow cytometry, immunoglobulin A (IgA) sequencing (IgA-seq), and plasma  
38 metabolomics to determine a microbial link to CD pathogenesis.

39 **Results:** We identified a distinct gut microbiota composition in CD progressors (CDP, children  
40 who developed CD during or after their gut microbiota were sampled) in each developmental  
41 phase. Pathogenesis and inflammation-related microbial pathways were enriched in CDP.  
42 Moreover, they had significantly more IgA coated bacteria and the IgA targets were significantly  
43 different compared to controls. Proinflammatory and pathogenesis-related metabolic pathways  
44 were enriched in CDP. Further, we identified inflammatory metabolites, particularly microbiota-  
45 derived taurodeoxycholic acid (TDCA) as increased in CDP.

46 **Conclusion:** Our study defines an inflammatory gut microbiota for the CDP including its  
47 composition, function, IgA response and related plasma metabolites. The inflammatory nature of  
48 CD gut microbiota during development is potentially related to the onset of the disease.  
49 Targeting inflammatory bacteria in this critical window could affect the pathogenesis and  
50 prognosis of CD.

51

52 **Significance of this study**

53 **What is already known on this subject?**

- 54 • Celiac Disease (CD) is a gluten induced immune-mediated disease in genetically  
55 predisposed individuals.
- 56 • CD incidence is increasing worldwide which genetics alone cannot explain. Previous  
57 studies have shown that the gut microbiota of CD patients differ from that of healthy  
58 populations. However, the role of the microbiome in CD pathogenesis and its role in  
59 chronic inflammation is yet to be established.

60 **What are the new findings?**

- 61 • In a prospective longitudinal study in children using samples representing all three phases  
62 of gut microbiota development (ages 1, 2.5 and 5), we identified significant differences in  
63 the composition and function of gut microbiota at each phase. Pathogenesis and  
64 inflammation-related functions are enriched in the gut microbiome of CD progressors.
- 65 • We applied IgA-sequencing to identify inflammatory bacteria in both healthy subjects  
66 and CD progressors. Flow Cytometry analysis identified more IgA coated bacteria at ages  
67 1 and 5 in CD progressors, indicating an early inflammatory response. CD bacterial IgA  
68 targets also differed significantly from healthy controls.
- 69 • We analyzed plasma metabolites obtained at age 5. The CD plasma metabolome was  
70 significantly different from healthy controls. Particularly, proinflammatory plasma  
71 metabolites, including microbiota-derived taurodeoxycholic acid (TDCA) and isobutyryl-  
72 L-carnitine, were increased two-fold in CD progressors.

73 **How might it impact clinical practice in the foreseeable future?**

- 74 • Our results establish a link between gut microbiota composition and chronic  
75 inflammation in CD during child development. The highly IgA-coated bacteria identified  
76 in IgA sequencing and inflammatory bacteria potentially contribute to CD pathogenesis.  
77 Targeting these bacteria in the early stages of CD development could be a preventative  
78 tool.
- 79 • TDCA is a microbiota-derived proinflammatory metabolite increased two-fold in CD  
80 progressors. Increased TDCA levels may be used as a predictive/diagnostic tool in  
81 genetically predisposed subjects. Moreover, targeting TDCA-producing bacteria (e.g.,  
82 *Clostridium XIVa* species) could potentially help to control the intestinal inflammation in  
83 CD.
- 84 • Developing anti-inflammatory probiotics/prebiotics might be viable therapeutics for  
85 altering microbiota composition in children genetically predisposed for CD. These  
86 microbes/compounds may also complement a gluten-free diet in patients that continue to  
87 experience persistent CD symptoms.

88

89

90

91

92

93

94

95

## 96 INTRODUCTION

97 Celiac disease (CD) is a gluten-induced autoimmune disorder that is predicted to affect 1  
98 in 100 individuals worldwide<sup>1</sup>. The adaptive autoimmune response in CD is characterized by  
99 gluten-specific CD4+ T cell and antibodies against gluten gliadin peptide and the enzyme tissue  
100 transglutaminase (tTG)<sup>2</sup> responsible for deamidating the gliadin peptide<sup>1</sup>. This biochemical  
101 reaction increases the immunogenicity of gliadin peptides. Antigen-presenting cells (APCs)  
102 present gliadin peptides to T cells and cause mucosal lesions in the small intestine<sup>3</sup>. Almost all  
103 CD patients possess HLA-DQ2 or HLA-DQ8. Although 20%- 40% of the population in Europe  
104 and the USA carries these alleles, only 1% of individuals develop the disease<sup>4</sup>. These findings  
105 suggest that the presence of HLA-DQ2 or HLA-DQ8 genes are necessary but not sufficient for  
106 the development of CD and thus environmental factors also play a role in disease onset<sup>3</sup>. King et  
107 al. recently showed that the incidence of CD to be increasing by 7.5% per year in the last  
108 decades<sup>5</sup>. Furthermore, even among twins, the concordance of CD is not 100 %<sup>6 7</sup>.

109 This evidence indicates that CD is a multifactorial disease and environmental factors play  
110 a role in CD onset. Various environmental factors are implicated in CD development<sup>8</sup>, but the  
111 roles of these environmental factors in CD progression remain largely unknown. Gut  
112 microbiome studies observe an altered microbial<sup>9</sup> and metabolite composition<sup>10 11</sup> in both infant  
113 and adult CD patients but have not identified any causal link<sup>12 13</sup>. Immunoglobulin A (IgA) is the  
114 most abundant antibody isotype at mucosal surfaces and is a major mediator of intestinal  
115 immunity in humans<sup>14</sup>. IgA-sequencing (IgA-seq) combines bacterial flow cytometry with high-  
116 throughput sequencing to identify distinct subsets of highly IgA coated (IgA+) and non-coated  
117 microbiota (IgA-)<sup>15-17</sup>. It was previously shown in a mice model that IgA+ microbiota could  
118 induce more severe colitis than IgA- microbiota<sup>18</sup>. Similarly, IgA-seq identified *Escherichia coli*

119 as an inflammatory bacterium enriched in Crohn's disease-patients with spondyloarthritis<sup>19</sup>.  
120 Therefore, we hypothesized that the pathogenic bacteria and some immunoregulatory  
121 commensals involved in CD onset would be highly coated with IgA (IgA+) while most of the  
122 commensals would not be coated (IgA-). We also hypothesized that the immune response would  
123 have specific targets in CD progressors that differ from the control targets.

124 In this study, we assessed the composition and function of the gut microbiota in a  
125 prospective, longitudinal cohort of 32 children matched for human leukocyte antigen (HLA)  
126 genotype and breastfeeding duration (n=16/group). We focused on samples obtained at ages 1,  
127 2.5 and 5 because these samples represent the three stages of gut microbiota development<sup>20</sup>. We  
128 then identified the functional pathways enriched in CD progressors, determined the targets of the  
129 IgA in the gut microbiota using IgA-seq. Lastly, we compared the plasma metabolome and  
130 identified significant differences. Our findings demonstrate that children who go on to develop  
131 CD have significant alterations in their gut microbiome years before diagnosis. CD-associated  
132 gut microbiota are enriched in inflammatory- and pathogenicity-related bacteria, as well as  
133 microbial functions and metabolites that potentially contribute to chronic inflammation in CD.

134

## 135 **EXPERIMENTAL PROCEDURE:**

### 136 **Human Fecal Samples**

137 The fecal samples were obtained from subjects in the All Babies in Southeast Sweden  
138 (ABIS) cohort. ABIS study was ethically approved by the Research Ethics Committees of the  
139 Faculty of Health Science at Linköping University, Sweden (Ref. 1997/96287 and 2003/03-092)  
140 and the Medical Faculty of Lund University, Sweden (Dnr 99227, Dnr 99321). All children born  
141 in southeast Sweden between 1<sup>st</sup> October 1997 and 1<sup>st</sup> October 1999 were recruited. Informed

142 consent from the parents was obtained. Fresh fecal samples were collected either at home or at  
143 the clinic. Samples collected at home were stored at -20 °C with freeze clamps, mailed to the  
144 WellBaby Clinic and stored dry at -80 °C. The questionnaire was completed by the parents to  
145 collect participants' health information including, but not limited to, breast feeding duration,  
146 antibiotic use, gluten exposure time, and more. In total 68 fecal samples were collected for the  
147 analysis (10 at 1 year old, 32 at 2.5 years old and 26 at 5 years old).

148

### 149 **IgA+ and IgA- Bacteria Separation and Fecal IgA Flow Cytometry**

150 IgA+ and IgA- bacteria separation was performed as previously describe<sup>18</sup>. Briefly,  
151 human fecal bacteria were stained with Anti-human IgA PE (clone IS11-8E10 Miltenyi Biotec)  
152 followed by Magnetic Activated Cell Separation (MACS) or flow cytometric analysis.  
153 Additional details are provided in the Supplemental Methods.

154

### 155 **Flow Cytometric analysis.**

156 Bacterial cells were isolated from fecal samples as described in the Supplemental  
157 Methods and analyzed by flow cytometry using a BD FACSAria™ IIIu cell sorter (Becton-  
158 Dickinson) as previously described<sup>15</sup>.

159

### 160 **16S rRNA Gene Sequencing and Statistical Analyses**

161 16S rRNA sequencing of the V4 region sequencing for all bacteria samples were  
162 performed on the Miseq platform with barcoded primers. Microbial diversity and statistical  
163 analyses were performed with *data 2*, *phyloseq 2*, *vegan*, *edge*, and *PICRUSt2*. Additional details  
164 are provided in the Supplemental Methods.

165

## 166 **Plasma Metabolomics and Metabolite pathway Analyses**

167 Preparation of plasma samples for metabolomics analysis and subsequent plasma

168 metabolomics and metabolite pathway analyses were performed as previously described<sup>21</sup>.

169 Additional details are provided in the Supplemental Methods.

170

171

## 172 **RESULTS**

### 173 **Study Cohort**

174 All Babies in Southeast Sweden (ABIS) is a prospective population-based study that

175 established a large biobank of biological specimens obtained longitudinally at birth and ages 1,

176 2.5, and 5. To determine the role of gut microbiota in CD pathogenesis, we used ABIS samples

177 selecting a sub cohort of 32 individuals born 1997-1999 in Sweden. We chose 16 subjects who

178 developed CD but were not diagnosed with any other autoimmune disease as of December 2017.

179 We matched this group with 16 healthy controls based on their HLA-risk class distribution and

180 breastfeeding duration (**Table S1**). The diagnosis of CD for 11 individuals occurred after the age

181 of 5, one subject was diagnosed at age 1.8 while the other four were diagnosed between the ages

182 of 2.5 and 5. Swedish National Patient Register<sup>22</sup> was used for verifying diagnosis of CD

183 according to international classification of disease (ICD) code-10 K90.0. In total, we used 68

184 longitudinal stool samples (**Table S1**). Although we did not match subjects for other parameters,

185 timing of gluten exposure, delivery method, breastfeeding duration, family history of CD,

186 infections and use of antibiotics were comparable between groups (**Table S1**).

### 187 **Celiac Disease Progressors Have a Distinct Gut Microbiota Composition**



188 By sequencing the V4 region of the 16S rRNA gene<sup>18</sup>, we identified 661 operational  
189 taxonomic units (OTUs) (**Table S2**). Consistent with previous studies<sup>23</sup>, gut microbiome alpha  
190 diversity increased until age 2.5 and remained stable up to age 5 in both groups. However, alpha  
191 diversity was significantly higher for the CD progressors at age 1, indicating a more diverse  
192 microbiota composition (**Figure 1A**). Beta diversity was comparable between CD and healthy  
193 controls in each phase (**Figure 1A**). Non-metric multidimensional scaling (NMDS) plots show a  
194 trend of separation of gut microbiome composition between CD and healthy control individuals  
195 at ages 1 and 2.5 (**Figure 1B**).

196 Relative abundance analyses of microbial taxa uncovered strong differences at both  
197 phylum and genus levels between the CD progression and healthy microbiota, with the largest  
198 differences occurring in the first year (**Figure 1C**). CD progressors had higher levels of  
199 Firmicutes than controls, while Verrucomicrobia was only identified in control samples. Relative  
200 abundances of the genera Prevotella, Romoboutsia, Roseburia, Rumminococcus, Ruminococcus2  
201 (Ruminococcus of family Lachospiraceae), Streptococcus, and Veillonella were higher in the CD  
202 progressors (**Fig 1C, D**). The Acinetobacter genus was highly enriched in controls but was  
203 absent in CD progressors at age 1. However, these differences dissipated over time at both the  
204 genus and phylum levels.

205 When we analyzed the differences at the level of OTUs, we identified 10 OTUs that are  
206 significantly ( $FDR \leq 0.05$ ,  $p < 0.05$ ) different at age 1. *Clostridium XVIII*, *Ruminococcus bromii*,  
207 *Bifidobacterium dentium*, and *Clostridium XIVA sciendens* were highly enriched in CD  
208 progressors while Enterococcus was highly enriched in control samples (**Figure S1A, Figure**  
209 **1D**). We identified more significant differences in OTU level at ages 2.5 and 5. 133 OTUs were  
210 different at age 2.5 and 112 OTUs were different at age 5 (**Figure 1E**). The most significantly

211 enriched OTUs in CD samples were *Dialister* and *Gemmiger* at age 2.5. On the other hand,  
212 *Bacteroides eggerthii* and *Methanobrevibacter*, and *Ruminococcus2* were highly enriched in  
213 healthy subjects (**Fig S1B**). Likewise, *Phascolarctobacterium faecium* and *Dialister* and  
214 *Ruminococcus* were enriched in CD samples while *Prevotella* and *Holdemanella* were enriched  
215 in healthy samples at age 5 (**Fig S1C**). These results demonstrate that the gut microbiota in CD  
216 progressors are significantly different from healthy controls in the first 5 years of life.

### 217 **CD progressors Have More Bacteria Coated with IgA Indicating an Inflammatory** 218 **Gut Microbiota Composition**

219 To test our initial IgA hypothesis, we used a modified method of IgA-sequencing<sup>1</sup>  
220 (**Figure S2A**). PCA analysis showed a clear separation between IgA+ and IgA- bacteria at all  
221 ages both in control and CD samples (**Figure 2A**). We also identified an overall separation for  
222 all samples (**Figure S2B**). We confirmed this finding using flow cytometry (**Figure S2C**). The  
223 flow cytometry analysis revealed that the number of IgA+ bacteria was increased from a least  
224 squares (LS) mean of 4.57% at age 1 to 8.88% at age 2.5 and maintained at 6.03% at age 5 in  
225 controls. On the other hand, IgA+ bacteria was already LS mean 11.05% at age 1 in the CD  
226 progressors, indicating a two fold increase compared to controls. It was 8.5 % at age 2.5,  
227 comparable to control samples. At age 5, there was a two-fold increase compared to the controls  
228 and 12.8 % of the bacteria was IgA+ in CD progressors (**Figure 2B**). These results reveal that  
229 CD progressors have more IgA+ bacteria especially at age 5 (p=0.026). When we removed the  
230 five CD progressors who developed CD before age 5 from the analysis, we had the same  
231 significant result (**Figure S2D**). This result indicates a more pathogenic gut microbiota  
232 composition and a more inflammatory environment for CD progressors. Moreover, we also show

233 that only a small fraction of the microbiota are coated by IgA during development (~ 5-8 %) in  
234 healthy controls and it is increased in the disease state (8.5-12 %).

### 235 **A Specific IgA Response to Bacteria Develops After Age 1**

236 Because there are very few reports on the IgA response in early human gut microbiota  
237 development<sup>17</sup>, we first focused on the results obtained from the healthy children. We did not  
238 observe any difference between IgA+ and IgA- samples in the control group at age 1 (**Figure**  
239 **S3A**). This result suggests that the IgA response does not target specific bacteria in this early  
240 stage of development. Consistent with the flow cytometry analysis, we identified 113 OTUs at  
241 age 2.5 and 43 OTUs at age 5 that were significantly different between IgA+ and IgA- samples  
242 in healthy controls (**Figure S3A, Table S2**). The top targets of IgA in healthy subjects were  
243 OTUs *Clostridium IV*, *Bifidobacterium* and *Bacteroides clarus* at age 2.5 and *Clostridium IV*,  
244 *Gemmiger* and *Elizabethkingia* at age 5.

245 Meanwhile we identified only one OTU, *Brucella*, that was different between IgA+ and  
246 IgA- samples in CD progressors at age 1. Notably, 121 and 41 OTUs were significantly different  
247 at ages 2.5 and 5, respectively (FDR $\leq$ 0.05, P<0.05; **Figure S3A**). CD progressors shared similar  
248 top IgA targets with those in healthy subjects such as *Clostridium IV* at ages 2.5 and 5 and  
249 *Gemmiger* at age 5. On the other hand, CD progressors showed unique targets of the IgA+  
250 including *Coprococcus comes*, *Bacteroides finegoldii* and *Methanobrevibacter* at age 2.5 and  
251 *Faecalibacterium prausnitzii*, *Clostridium XIVa* and *Streptococcus* at age 5.

### 252 **IgA Response Targets Are Comprised of Different Bacteria in CD progressors**

253 Consistent with the presorting data, the alpha diversity increased at age 2.5 and remained  
254 stable in both control and CD IgA- groups (**Figure 2C**). Likewise, beta diversity was comparable  
255 between CD IgA- and control IgA- samples (**Figure 2C**). There was a separation of IgA- gut

256 microbiome composition between CD and healthy control individuals at ages 1 and 2.5 (**Figure**  
257 **2D**). The first year IgA- microbiome composition was most different at the phylum and genus  
258 levels between groups as observed in the presorting samples for the same time point. These  
259 observed differences were less pronounced in the IgA+ samples and mostly dissipated over time  
260 (**Figure 2E**). At age 2.5, IgA-seq identified 144 different OTUs between control IgA- samples  
261 and CD IgA- samples. Likewise, we identified 167 different OTUs between control IgA+  
262 samples and CD IgA+ samples (FDR<0.05, p<0.05, **Figure S3B**). At age 5, 71 OTUs were  
263 different between control IgA- and CD IgA- samples. Additionally, 112 different OTUs were  
264 identified for CD IgA+ and control IgA+ samples (**Figure S3B**). The top differential targets of  
265 the immune system were *Clostridium IV*, *Bacteroides finegoldii*, and *Dislister propionicifaciens*  
266 at age 2.5 and *Enterobacter*, *Blautia*, and *Enterobacteriaceae* at age 5 in CD progressors.

267 In addition to the differences caused by altered gut microbiota composition, we also  
268 identified 72 OTUs at age 2.5 and 45 OTUs at age 5 in which abundances were the same in the  
269 gut microbiota of CD and healthy samples (presorting) but differentially targeted by the immune  
270 system (**Table S3**). For example, *Lachnospiraceae*, *Bacterioides finegoldii* (**Figure S3C, 1E**),  
271 and *Bacteroides vulgatus* OTUs at age 2.5 and *Enterobacter*, *Blautia* (**Figure S3C**), and  
272 *Barnesiella* OTUs at age 5 were coated with IgA in CD groups but not in controls. Overall, these  
273 results indicate that not only gut microbiota composition, but also the IgA response to microbiota,  
274 is altered in CD progressors.

## 275 **Pathogenesis and Inflammation Related Functions Are Enriched in CD Progressors'** 276 **Gut Microbiota**

277 Phylogenetic Investigation of Communities by Reconstruction of Unobserved States  
278 (PICRUSt) analysis<sup>24</sup> is designed to estimate the functional metagenome of gut bacteria using

279 16S rRNA data (**Figure S4A**). Combining PICRUSt with Kyoto Encyclopedia of Genes and  
280 Genomes (KEGG) metabolic pathway analysis, we identified 71 different metabolic pathways  
281 that differed between CD and control samples at age 1 (FDR<0.05, **Figure 3A**). Among these  
282 pathways, N-glycan biosynthesis, penicillin and cephalosporin biosynthesis, beta-Lactam  
283 resistance and bacterial chemotaxis pathways were the top pathways enriched in CD progressors  
284 (**Figure S5A**). Interestingly, most of these pathways are involved in bacterial pathogenesis<sup>25 26</sup> or  
285 shaping the composition of microbiota<sup>27 28</sup>. We also identified 9 pathways showing strong trends  
286 of difference at ages 2.5 and 5. For example, styrene degradation, lysine degradation, fatty acid  
287 metabolism and glutathione metabolism were decreased in CD progressors at age 2.5 (P≤0.05)  
288 (**Figure S5B**). Meanwhile, retinol metabolism, steroid hormone biosynthesis, and  
289 glycosaminoglycan degradation pathways were increased in CD progressors at age 5 (P<0.05)  
290 (**Figure S5C**). We also identified interesting correlations between the most abundant 20 OTUs  
291 and most different 20 metabolic pathways (**Table S4**). Among these correlated OTUs, some  
292 were identified at the species level at each phase (**Figure S6A-C**)

293 We also used PICRUSt to examine the functional pathways comparing IgA+ to IgA-  
294 microbiota (**Figure 3B, S4B, Table S5**). We identified styrene degradation pathway enriched in  
295 IgA+ population at age 1. Further, we identified 31 different functional pathways at age 2.5 and  
296 23 functional pathways at age 5 (FDR<0.05) in the healthy subjects. The top enriched pathways  
297 in healthy IgA+ population were styrene degradation, chloroalkane and chloroalkene degradation,  
298 and toluene degradation at the ages of 2.5 and 5 years old. Analyzing CD samples, we identified  
299 7 pathways at age 1, 28 pathways at age 2.5 and 13 pathways at age 5 enriched in IgA+  
300 microbiota (FDR<0.05). The most significantly enriched pathways in CD IgA+ microbiota were  
301 beta- alanine metabolism, chloroalkane and chloroalkene degradation, and styrene degradation

302 for all three phases. At age 1, CD progressors had more metabolic pathways predicted to be  
303 enriched in the IgA+ samples compared to healthy control. For example, pathogenic pathways,  
304 bacterial invasion of epithelial cells and beta-alanine metabolism were identified in CD IgA+  
305 microbiota population but was absent in control IgA+ at age 1.

### 306 **Plasma Metabolomics Analysis Reveals an Inflammatory Metabolic Profile for CD** 307 **Progressors**

308 In order to determine the early markers of CD progression in the plasma metabolome and  
309 its link to gut microbiota, we applied a targeted plasma metabolomics analysis. We used 10 CD  
310 and 9 control plasma samples obtained at age 5. Three subjects in the CD group were diagnosed  
311 before age 5. In total, we identified 386 metabolites. Partial least squares-discriminant analysis  
312 (PLS-DA) showed a clear separation of the plasma metabolites between CD-progressors and  
313 healthy control groups (**Figure 4A**). Volcano plots show the most significantly altered  
314 metabolites (**Figure 4B, Table S6**). We identified a clear separation between these groups and  
315 19 out of 387 metabolites were significantly different ( $p < 0.05$ , **Table S6**) between the two  
316 groups. The top three most altered metabolites ( $p < 0.01$ ) were TDCA, Glucono-D-lactone and  
317 Isobutyryl-L-carnitine. All three top metabolites were increased in CD samples (**Figure 4C**). The  
318 most altered metabolite, TDCA, is a conjugated bile acid that was shown to be  
319 proinflammatory<sup>29</sup>. TDCA is mainly produced by gut microbes, particularly by Clostridium  
320 XIVa and Clostridium XI, with 7- $\alpha$ -dehydroxylation of taurocholic acid and cholic acid<sup>30</sup>. This  
321 result is consistent with our microbiota analysis since we identified several Clostridium XIVa  
322 OTUs that were significantly more abundant in CD samples, especially at age 5 (**Figure 4D**).  
323 The heat map shows 50 of the most altered metabolites and indicates a strong signature in the  
324 plasma metabolome in which 19 metabolites were significantly altered ( $p < 0.05$ ) (**Figure 4E**).

325 We used Pathway Analysis to determine the functions related to these metabolites (**Figure 4F**,  
326 **Table S4**). Indeed, pentose phosphate pathway (PPP), lysine degradation, and glycolipid  
327 metabolism were the most significantly altered pathways.

## 328 **DISCUSSION**

329 Recent studies have demonstrated strong associations between the gut microbiota and the  
330 pathogenesis of autoimmune diseases<sup>31</sup>. Studies of the gut microbiome in CD have demonstrated  
331 intestinal dysbiosis in CD patients<sup>9 13 32 33</sup>. However, the majority of these studies were  
332 performed using adult samples with diagnosed disease and none of them used a longitudinal  
333 approach as this study. Human gut microbiota development is divided into three phases; a  
334 developmental phase (months 3-14), a transitional phase (months 15-30), and a stable phase  
335 (months 31-46)<sup>20</sup>. Because recent data show that most childhood CD cases will develop by age  
336 5years<sup>34</sup>, we analyzed samples representing all of these critical phases. We report, for what we  
337 believe is the first time, that there are significant differences in microbiome composition and  
338 function at each developmental phase in CD progressors.

339 In this study, we first showed that alpha diversity was significantly higher in the CD  
340 progressors compared to healthy controls at age 1 (**Figure 1A**). This was an unexpected finding  
341 since alpha diversity is reported to be lower in children developing Type 1 Diabetes indicating a  
342 difference between two immune-mediated diseases<sup>35</sup>. Consistent with previous reports<sup>33</sup>, we  
343 identified the proportion of phylum Firmicutes higher in CD progressors at age 1. (**Figure 1C**).  
344 Bacterial proteases of species mostly classified within the Firmicutes phylum are involved in  
345 gluten metabolism and this might be a link to CD<sup>36</sup>. Additionally, we observed that phylum  
346 Verrucomicrobia was only identified in control group at age 1. *Akkermansia* is the only genus of  
347 the Verrucomicrobia phylum identified in gut microbiota<sup>37</sup>. In particular, *Akkermansia*

348 *muciniphila* has a key role in maintaining the integrity and the function of the mucus barrier and  
349 it is inversely associated with several diseases<sup>38</sup>. Further, we identified bacterial species highly  
350 enriched in CD progressors at age 1 including *Ruminococcus bromii*, *Bifidobacterium dentium*,  
351 and *Clostridium XIVa sciendens*. A previous study reported that the abundance of *R. bromii* was  
352 greatly reduced in CD patients when gluten free (GF) diet was introduced<sup>39</sup>. Consistent with our  
353 findings, other studies have shown that the abundance of *B. dentium* was increased in the CD  
354 patients<sup>40</sup>. Clostridium XIVa genus is responsible for producing the proinflammatory metabolite  
355 TDCA. As subjects aged, the differences in the gut microbiota was decreased at the phylum level  
356 but significantly increased in the OTU level, which is more informative about massive alterations  
357 in the microbiota of CD progressors.

358 Intestinal IgA plays a crucial role in defending against pathogenic microorganisms and in  
359 maintaining gut microbiome homeostasis. Interestingly, IgA-deficient patients are more  
360 susceptible to variety of pathologies, including CD<sup>41</sup>. Planer et al described mucosal IgA  
361 responses progression during two postnatal years in healthy US twins<sup>17</sup>. They showed that (i)  
362 IgA coated bacteria is affected by age and host genetics and (ii) IgA response is determined by  
363 "intrinsic" properties of gut microbiota community members. We used a similar approach to  
364 investigate the gut immune development towards healthy and CD states, we initially focused on  
365 the development of the IgA response during the gut microbiota maturation. At age 1, we did not  
366 identify any OTUs that were significantly different in IgA- and IgA+ samples, suggesting that  
367 the intestinal IgA response is not mature enough to target specific bacteria in the gut. However,  
368 we identified one OTU in the pathogenic *Brucella* genus that was highly coated with IgA in CD  
369 progressors. Further studies using distinct cohorts will be needed to verify this result, but  
370 *Brucella* species are well characterized pathogens<sup>42</sup> and might be related to increased



371 inflammation and IgA responses. Flow cytometry analyses showed that the IgA response is  
372 highly selective and only a small fraction of the gut microbiota is highly coated with IgA in the  
373 first five years of life. More importantly, the percentage of IgA+ bacteria was higher in CD  
374 progressors compared with healthy controls at ages 1 and age 5. While a reduction of secretory  
375 IgA (sIgA) using infant (4-6 months) fecal samples in CD progressors<sup>12</sup> was reported previously,  
376 we did not observe such a defect in our cohort but identified a two fold increase in the number of  
377 IgA coated bacteria in CD progressors especially at age 5.

378 Our analysis revealed 144 OTUs at age 2.5 and 167 OTUs at age 5 years old that were  
379 highly IgA coated in the CD progressors. Among them *Coprococcus comes*, *Bacteroides*  
380 *finnegoldii* at age 2.5 and *Faecalibacterium prausnitzii* and *Clostridium\_XIVa* at age 5 were the  
381 main targets of the mucosal immune response in CD progressors. Among these bacteria,  
382 *Coprococcus comes* has been recently identified as the main IgA target in the human colon<sup>43</sup>.  
383 Notably, we identified 72 OTUs at age 2.5 and 45 OTUs at age 5 that are equally abundant in  
384 CD progressors and healthy controls, but selectively targeted by IgA in CD progressors. Some of  
385 these OTUs are at the species level. For example, *Bacterioides finnegoldii*, and *Bacteroides*  
386 *vulgatus* at age 2.5 and *Peptostreptococcus stomatis* at age 5 were selectively targeted by IgA in  
387 CD progressors but not in controls. *B. vulgatus* was implicated in the development of gut  
388 inflammation and a previous report identified this bacterium as enriched in older children with  
389 CD<sup>44,45</sup>. In agreement with our results, a pathogenic role for Bacteriodes species is found to be  
390 related to the loss of integrity of the intestinal epithelial barrier<sup>45</sup>.

391 PICRUST analyses showed significant differences at all developmental phases, in  
392 particular, within the transition period at age 1. Most significant differences were identified in  
393 pathways related to bacterial pathogenesis and shaping the composition of microbiota. For

394 example, glutathione metabolism was greatly decreased in CD progressors. Decreased  
395 glutathione redox cycle in CD patients is strongly associated with disease development<sup>46</sup>. At age  
396 5, PICRUST predicted that retinol metabolism, steroid hormone biosynthesis, and  
397 glycosaminoglycan degradation as over-represented pathways in CD progressors. Retinoic acid  
398 is one of the products of retinol metabolism and plays a key role in the intestinal immune  
399 response<sup>47</sup>. A previous study showed that retinoic acid mediated inflammatory responses to  
400 gluten in CD patients<sup>48</sup>. The increased retinol metabolism and glycosaminoglycan degradation  
401 pathways in CD progressors are potentially related to chronic inflammation. Indeed,  
402 glycosaminoglycan help to form a protective barrier for the intestinal mucin. The breakdown of  
403 glycosaminoglycan is reported to be associated with inflammatory response in intestinal  
404 disorders such as IBD<sup>49</sup>. These results suggest that during the developmental phase, the gut  
405 microbiota functions in CD progressors were related to shaping the gut microbiota composition.  
406 Entering the transition phase, the gut microbiota in CD progressors displayed more  
407 proinflammatory and oxidative stress related features. At stable phases, gut microbiota in CD  
408 progressors begin to become more involved in functions related to the clinical manifestation of  
409 the disease. This longitudinal observation provides insight into the proinflammatory and  
410 pathogenic function of gut microbiota in different stages of early CD pathogenesis.

411         Although the hallmark of the CD is intestinal inflammation, the disease affects different  
412 tissues. To determine the systemic effects of gut microbiota on different organs, we performed a  
413 comparative plasma metabolomics analysis at age 5. In agreement with the gut microbiota  
414 analysis, plasma metabolites were significantly altered prior to diagnosis in CD progressors. The  
415 top plasma metabolites altered were TDCA and Isobutyryl-L-carnitine (**Figure 4C**) in which  
416 both were increased two-fold in CD progressors. TDCA is a conjugated bile acid that is shown to

417 be proinflammatory<sup>29</sup> and is mainly produced by gut bacteria, particularly by *Clostridium XIVa*  
418 and *Clostridium XI*<sup>30</sup>. This observation suggests that the plasma TDCA detected in our study is  
419 secondary to the increased abundance of some *Clostridium XIVa* species in CD progressors at  
420 age 5 (**Fig 4D**). Likewise, Isobutyryl-L-carnitine is a member of acylcarnitines. As the byproduct  
421 of incomplete beta oxidation, the increased isobutyryl-L-carnitine is related to abnormalities in  
422 fatty acid metabolism<sup>50</sup> and activates proinflammatory signaling<sup>51</sup>. Pathway analysis for plasma  
423 metabolites identified several pathways including pentose phosphate pathway (PPP), lysine  
424 degradation, and glycerolipid metabolism. PPP was identified as the most significantly altered  
425 pathway and stimulates formation of NADPH for antioxidant, thereby controlling cell  
426 inflammation. Thus, plasma metabolites of CD progressors are a component of the inflammatory  
427 storm.

428         Currently, the only way to treat CD is strict adherence to a gluten-free (GF) diet, but 20%  
429 of patients do not respond to GF diet and continue to have persistent or recurrent symptoms<sup>52</sup>.  
430 CD permanently reshapes intestinal immunity and alterations in TCR $\gamma\delta$ <sup>+</sup> intraepithelial  
431 lymphocytes in particular may underlie non-responsiveness to the GF diet<sup>53</sup>. Our findings  
432 suggest that the inflammatory nature of the CD progressors' gut microbiota is a key component  
433 of intestinal inflammation in CD. The proinflammatory factors identified in this study potentially  
434 trigger local and systemic inflammation independent of the diet and may explain a failure to  
435 respond to GF diet in some patients. Taken together, our findings suggest that the gut microbiota  
436 of CD progressors in the first five years of life has profound effects on the inflammatory  
437 response and can potentially contribute to onset and progression of CD. These early markers, for  
438 example TDCA, have the potential to serve as useful biomarkers for CD diagnosis.

439 Understanding the role of the gut microbiota in chronic inflammation in CD may open novel  
440 approaches to understand disease pathogenesis and reveal new preventive and treatment models.

441

442 **Acknowledgements:**

443 We are grateful to all children participating in the ABIS study, and their parents. Thanks  
444 also to Ingela Johansson, KEF, Linköping, for her skillful work with the samples, and Åshild  
445 Faresjö for register data. The authors also want to thank Hui Pan, Jonathan Dreyfuss (Joslin  
446 Diabetes Center Bioinformatic Core) and Sam Minot (Microbiome Research Initiative, Fred  
447 Hutchinson Cancer Research Center) for their help with bioinformatic analysis and statistics. The  
448 authors would also like to acknowledge Patrick Autissier for the cytometry service (Flow  
449 Cytometry Core of Boston College) and Sandra Dedrick (Boston College) for her comments on  
450 the text. The ABIS-study has been supported by Swedish Research Council (K2005-72X-11242-  
451 11A and K2008-69X-20826-01-4) and the Swedish Child Diabetes Foundation  
452 (Barndiabetesfonden), JDRF Wallenberg Foundation (K 98-99D-12813-01A), Medical Research  
453 Council of Southeast Sweden (FORSS) and the Swedish Council for Working Life and Social  
454 Research (FAS2004–1775) and Östgöta Brandstodsbolag. This work was supported by NIH  
455 NIDDK 1K01DK117967-01 and a G. Harold & Leila Y. Mathers Foundation grants to EA.

456

457 **Author contributions:** Q.H and E.A designed research and wrote the paper. Q.H assisted  
458 with all experiments, J. L is the Head of the ABIS study and assisted with human fecal sample  
459 collection, classification and interpreting the data. Y.Y and N.W.P assisted with IgA-seq  
460 experiments and analysis. V.T and M.A.K assisted with plasma metabolomics analysis. J.F.L

461 assisted with research design and writing. All authors helped the analysis of the data that they  
462 contributed to produce and approved the final version of the manuscript.

463

## 464 REFERENCES

- 465 1. Lebwohl B, Sanders DS, Green PHR. Coeliac disease. *Lancet* 2018;391(10115):70-81. doi:  
466 10.1016/S0140-6736(17)31796-8 [published Online First: 2017/08/02]
- 467 2. Lindfors K, Ciacci C, Kurppa K, et al. Coeliac disease. *Nat Rev Dis Primers* 2019;5(1):3. doi:  
468 10.1038/s41572-018-0054-z [published Online First: 2019/01/12]
- 469 3. Liu E, Lee HS, Aronsson CA, et al. Risk of pediatric celiac disease according to HLA haplotype and  
470 country. *N Engl J Med* 2014;371(1):42-9. doi: 10.1056/NEJMoa1313977 [published Online First:  
471 2014/07/06]
- 472 4. Wolters VM, Wijmenga C. Genetic background of celiac disease and its clinical implications. *Am J*  
473 *Gastroenterol* 2008;103(1):190-5. doi: 10.1111/j.1572-0241.2007.01471.x [published Online  
474 First: 2008/01/11]
- 475 5. King JA, Jeong J, Underwood FE, et al. Incidence of Celiac Disease Is Increasing Over Time: A  
476 Systematic Review and Meta-analysis. *Am J Gastroenterol* 2020 doi:  
477 10.14309/ajg.0000000000000523 [published Online First: 2020/02/06]
- 478 6. Greco L, Romino R, Coto I, et al. The first large population based twin study of coeliac disease. *Gut*  
479 2002;50(5):624-8. doi: 10.1136/gut.50.5.624 [published Online First: 2002/04/16]
- 480 7. Kujala-Halkola R, Lebwohl B, Halfvarson J, et al. Heritability of non-HLA genetics in coeliac disease: a  
481 population-based study in 107 000 twins. *Gut* 2016;65(11):1793-98. doi: 10.1136/gutjnl-2016-  
482 311713 [published Online First: 2016/05/22]
- 483 8. Lionetti E, Catassi C. The Role of Environmental Factors in the Development of Celiac Disease: What Is  
484 New? *Diseases* 2015;3(4):282-93. doi: 10.3390/diseases3040282 [published Online First:  
485 2015/10/27]
- 486 9. Nistal E, Caminero A, Vivas S, et al. Differences in faecal bacteria populations and faecal bacteria  
487 metabolism in healthy adults and celiac disease patients. *Biochimie* 2012;94(8):1724-9. doi:  
488 10.1016/j.biochi.2012.03.025 [published Online First: 2012/05/01]
- 489 10. Serena G, Yan S, Camhi S, et al. Proinflammatory cytokine interferon-gamma and microbiome-  
490 derived metabolites dictate epigenetic switch between forkhead box protein 3 isoforms in  
491 coeliac disease. *Clin Exp Immunol* 2017;187(3):490-506. doi: 10.1111/cei.12911 [published  
492 Online First: 2016/12/10]
- 493 11. Sellitto M, Bai G, Serena G, et al. Proof of concept of microbiome-metabolome analysis and delayed  
494 gluten exposure on celiac disease autoimmunity in genetically at-risk infants. *PLoS One*  
495 2012;7(3):e33387. doi: 10.1371/journal.pone.0033387 [published Online First: 2012/03/21]
- 496 12. Olivares M, Walker AW, Capilla A, et al. Gut microbiota trajectory in early life may predict  
497 development of celiac disease. *Microbiome* 2018;6(1):36. doi: 10.1186/s40168-018-0415-6  
498 [published Online First: 2018/02/21]
- 499 13. Cheng J, Kalliomaki M, Heilig HG, et al. Duodenal microbiota composition and mucosal homeostasis  
500 in pediatric celiac disease. *BMC Gastroenterol* 2013;13:113. doi: 10.1186/1471-230X-13-113  
501 [published Online First: 2013/07/13]
- 502 14. Bunker JJ, Bendelac A. IgA Responses to Microbiota. *Immunity* 2018;49(2):211-24. doi:  
503 10.1016/j.immuni.2018.08.011 [published Online First: 2018/08/23]

- 504 15. Wilmore JR, Gaudette BT, Gomez Atria D, et al. Commensal Microbes Induce Serum IgA Responses  
505 that Protect against Polymicrobial Sepsis. *Cell Host Microbe* 2018;23(3):302-11 e3. doi:  
506 10.1016/j.chom.2018.01.005 [published Online First: 2018/02/27]
- 507 16. Bunker JJ, Erickson SA, Flynn TM, et al. Natural polyreactive IgA antibodies coat the intestinal  
508 microbiota. *Science* 2017;358(6361) doi: 10.1126/science.aan6619 [published Online First:  
509 2017/10/04]
- 510 17. Planer JD, Peng Y, Kau AL, et al. Development of the gut microbiota and mucosal IgA responses in  
511 twins and gnotobiotic mice. *Nature* 2016;534(7606):263-6. doi: 10.1038/nature17940  
512 [published Online First: 2016/06/10]
- 513 18. Palm NW, de Zoete MR, Cullen TW, et al. Immunoglobulin A coating identifies colitogenic bacteria in  
514 inflammatory bowel disease. *Cell* 2014;158(5):1000-10. doi: 10.1016/j.cell.2014.08.006  
515 [published Online First: 2014/08/30]
- 516 19. Viladomiu M, Kivolowitz C, Abdulhamid A, et al. IgA-coated E. coli enriched in Crohn's disease  
517 spondyloarthritis promote TH17-dependent inflammation. *Sci Transl Med* 2017;9(376) doi:  
518 10.1126/scitranslmed.aaf9655 [published Online First: 2017/02/10]
- 519 20. Stewart CJ, Ajami NJ, O'Brien JL, et al. Temporal development of the gut microbiome in early  
520 childhood from the TEDDY study. *Nature* 2018;562(7728):583-88. doi: 10.1038/s41586-018-  
521 0617-x [published Online First: 2018/10/26]
- 522 21. Drolet J, Tolstikov V, Williams BA, et al. Integrated Metabolomics Assessment of Human Dried Blood  
523 Spots and Urine Strips. *Metabolites* 2017;7(3) doi: 10.3390/metabo7030035 [published Online  
524 First: 2017/07/18]
- 525 22. Ludvigsson JF, Andersson E, Ekblom A, et al. External review and validation of the Swedish national  
526 inpatient register. *BMC Public Health* 2011;11:450. doi: 10.1186/1471-2458-11-450 [published  
527 Online First: 2011/06/11]
- 528 23. Koenig JE, Spor A, Scalfone N, et al. Succession of microbial consortia in the developing infant gut  
529 microbiome. *Proc Natl Acad Sci U S A* 2011;108 Suppl 1:4578-85. doi: 10.1073/pnas.1000081107  
530 [published Online First: 2010/07/30]
- 531 24. Langille MG, Zaneveld J, Caporaso JG, et al. Predictive functional profiling of microbial communities  
532 using 16S rRNA marker gene sequences. *Nat Biotechnol* 2013;31(9):814-21. doi:  
533 10.1038/nbt.2676 [published Online First: 2013/08/27]
- 534 25. Tan FY, Tang CM, Exley RM. Sugar coating: bacterial protein glycosylation and host-microbe  
535 interactions. *Trends Biochem Sci* 2015;40(7):342-50. doi: 10.1016/j.tibs.2015.03.016 [published  
536 Online First: 2015/05/06]
- 537 26. Matilla MA, Krell T. The effect of bacterial chemotaxis on host infection and pathogenicity. *FEMS*  
538 *Microbiol Rev* 2018;42(1) doi: 10.1093/femsre/fux052 [published Online First: 2017/10/27]
- 539 27. Aharonowitz Y, Cohen G, Martin JF. Penicillin and cephalosporin biosynthetic genes: structure,  
540 organization, regulation, and evolution. *Annu Rev Microbiol* 1992;46:461-95. doi:  
541 10.1146/annurev.mi.46.100192.002333 [published Online First: 1992/01/01]
- 542 28. Moore AM, Ahmadi S, Patel S, et al. Gut resistome development in healthy twin pairs in the first year  
543 of life. *Microbiome* 2015;3:27. doi: 10.1186/s40168-015-0090-9 [published Online First:  
544 2015/06/27]
- 545 29. Fujisaka S, Ussar S, Clish C, et al. Antibiotic effects on gut microbiota and metabolism are host  
546 dependent. *J Clin Invest* 2016;126(12):4430-43. doi: 10.1172/JCI86674 [published Online First:  
547 2016/10/25]
- 548 30. Ridlon JM, Kang DJ, Hylemon PB. Bile salt biotransformations by human intestinal bacteria. *J Lipid*  
549 *Res* 2006;47(2):241-59. doi: 10.1194/jlr.R500013-JLR200 [published Online First: 2005/11/22]

- 550 31. Marietta E, Horwath I, Balakrishnan B, et al. Role of the intestinal microbiome in autoimmune  
551 diseases and its use in treatments. *Cell Immunol* 2019;339:50-58. doi:  
552 10.1016/j.cellimm.2018.10.005 [published Online First: 2018/10/28]
- 553 32. D'Argenio V, Casaburi G, Precone V, et al. Metagenomics Reveals Dysbiosis and a Potentially  
554 Pathogenic *N. flavescens* Strain in Duodenum of Adult Celiac Patients. *Am J Gastroenterol*  
555 2016;111(6):879-90. doi: 10.1038/ajg.2016.95 [published Online First: 2016/04/06]
- 556 33. Wacklin P, Kaukinen K, Tuovinen E, et al. The duodenal microbiota composition of adult celiac  
557 disease patients is associated with the clinical manifestation of the disease. *Inflamm Bowel Dis*  
558 2013;19(5):934-41. doi: 10.1097/MIB.0b013e31828029a9 [published Online First: 2013/03/13]
- 559 34. Lionetti E, Castellaneta S, Francavilla R, et al. Introduction of gluten, HLA status, and the risk of celiac  
560 disease in children. *N Engl J Med* 2014;371(14):1295-303. doi: 10.1056/NEJMoa1400697  
561 [published Online First: 2014/10/02]
- 562 35. Kostic AD, Gevers D, Siljander H, et al. The dynamics of the human infant gut microbiome in  
563 development and in progression toward type 1 diabetes. *Cell Host Microbe* 2015;17(2):260-73.  
564 doi: 10.1016/j.chom.2015.01.001 [published Online First: 2015/02/11]
- 565 36. Caminero A, Herran AR, Nistal E, et al. Diversity of the cultivable human gut microbiome involved in  
566 gluten metabolism: isolation of microorganisms with potential interest for coeliac disease. *FEMS*  
567 *Microbiol Ecol* 2014;88(2):309-19. doi: 10.1111/1574-6941.12295 [published Online First:  
568 2014/02/07]
- 569 37. Geerlings SY, Kostopoulos I, de Vos WM, et al. Akkermansia muciniphila in the Human  
570 Gastrointestinal Tract: When, Where, and How? *Microorganisms* 2018;6(3) doi:  
571 10.3390/microorganisms6030075 [published Online First: 2018/07/26]
- 572 38. Cani PD, de Vos WM. Next-Generation Beneficial Microbes: The Case of Akkermansia muciniphila.  
573 *Front Microbiol* 2017;8:1765. doi: 10.3389/fmicb.2017.01765 [published Online First:  
574 2017/10/12]
- 575 39. Bonder MJ, Tigchelaar EF, Cai X, et al. The influence of a short-term gluten-free diet on the human  
576 gut microbiome. *Genome Med* 2016;8(1):45. doi: 10.1186/s13073-016-0295-y [published Online  
577 First: 2016/04/23]
- 578 40. Collado MC, Donat E, Ribes-Koninckx C, et al. Imbalances in faecal and duodenal Bifidobacterium  
579 species composition in active and non-active coeliac disease. *BMC Microbiol* 2008;8:232. doi:  
580 10.1186/1471-2180-8-232 [published Online First: 2008/12/24]
- 581 41. Chow MA, Lebwohl B, Reilly NR, et al. Immunoglobulin A deficiency in celiac disease. *J Clin*  
582 *Gastroenterol* 2012;46(10):850-4. doi: 10.1097/MCG.0b013e31824b2277 [published Online  
583 First: 2012/04/06]
- 584 42. Delpino MV, Fossati CA, Baldi PC. Occurrence and potential diagnostic applications of serological  
585 cross-reactivities between Brucella and other alpha-proteobacteria. *Clin Diagn Lab Immunol*  
586 2004;11(5):868-73. doi: 10.1128/CDLI.11.5.868-873.2004 [published Online First: 2004/09/11]
- 587 43. Sterlin D, Fieschi C, Malphettes M, et al. Immune/microbial interface perturbation in human IgA  
588 deficiency. *Gut Microbes* 2019;10(3):429-33. doi: 10.1080/19490976.2018.1546520 [published  
589 Online First: 2018/11/20]
- 590 44. Schippa S, Iebba V, Barbato M, et al. A distinctive 'microbial signature' in celiac pediatric patients.  
591 *BMC Microbiol* 2010;10:175. doi: 10.1186/1471-2180-10-175 [published Online First:  
592 2010/06/23]
- 593 45. Shiba T, Aiba Y, Ishikawa H, et al. The suppressive effect of bifidobacteria on Bacteroides vulgatus, a  
594 putative pathogenic microbe in inflammatory bowel disease. *Microbiol Immunol*  
595 2003;47(6):371-8. doi: 10.1111/j.1348-0421.2003.tb03368.x [published Online First:  
596 2003/08/09]

- 597 46. Stojiljkovic V, Pejic S, Kasapovic J, et al. Glutathione redox cycle in small intestinal mucosa and  
598 peripheral blood of pediatric celiac disease patients. *An Acad Bras Cienc* 2012;84(1):175-84. doi:  
599 10.1590/s0001-37652012000100018 [published Online First: 2012/03/24]
- 600 47. Mucida D, Park Y, Kim G, et al. Reciprocal TH17 and regulatory T cell differentiation mediated by  
601 retinoic acid. *Science* 2007;317(5835):256-60. doi: 10.1126/science.1145697 [published Online  
602 First: 2007/06/16]
- 603 48. DePaolo RW, Abadie V, Tang F, et al. Co-adjuvant effects of retinoic acid and IL-15 induce  
604 inflammatory immunity to dietary antigens. *Nature* 2011;471(7337):220-4. doi:  
605 10.1038/nature09849 [published Online First: 2011/02/11]
- 606 49. Winslet MC, Poxon V, Allan A, et al. Mucosal glucosamine synthetase activity in inflammatory bowel  
607 disease. *Dig Dis Sci* 1994;39(3):540-4. doi: 10.1007/bf02088339 [published Online First:  
608 1994/03/01]
- 609 50. Vreken P, van Lint AE, Bootsma AH, et al. Quantitative plasma acylcarnitine analysis using  
610 electrospray tandem mass spectrometry for the diagnosis of organic acidaemias and fatty acid  
611 oxidation defects. *J Inherit Metab Dis* 1999;22(3):302-6. doi: 10.1023/a:1005587617745  
612 [published Online First: 1999/06/29]
- 613 51. Rutkowski JM, Knotts TA, Ono-Moore KD, et al. Acylcarnitines activate proinflammatory signaling  
614 pathways. *Am J Physiol Endocrinol Metab* 2014;306(12):E1378-87. doi:  
615 10.1152/ajpendo.00656.2013 [published Online First: 2014/04/25]
- 616 52. Stasi E, Marafini I, Caruso R, et al. Frequency and Cause of Persistent Symptoms in Celiac Disease  
617 Patients on a Long-term Gluten-free Diet. *J Clin Gastroenterol* 2016;50(3):239-43. doi:  
618 10.1097/MCG.0000000000000392 [published Online First: 2015/08/19]
- 619 53. Mayassi T, Ladell K, Gudjonson H, et al. Chronic Inflammation Permanently Reshapes Tissue-Resident  
620 Immunity in Celiac Disease. *Cell* 2019;176(5):967-81 e19. doi: 10.1016/j.cell.2018.12.039  
621 [published Online First: 2019/02/12]

622

623

624

625

626

627

628

629

630

631

632



633

## Figure Legends

634

635 **Figure 1. The Gut Microbiota of Children Developing CD and Healthy Controls were**  
636 **Different in the First 5 Years of Life.**

637 **a.** Box plots showing the comparison between CD progressors and healthy controls : the alpha  
638 diversity measured by observed (upper panel) and the beta diversity measured by Bray–Curtis  
639 dissimilarity (lower panel).

640 **b.** Non-metric MultiDimensional Scaling (NMDS) analysis ordination of sample  
641 similarity/dissimilarity between CD progressors and healthy controls at age 1, 2.5, and 5 years  
642 old. Each circle represents an individual sample.

643 **c.** Average relative abundance of bacterial phylum (upper panel) or genera (lower panel) of  
644 greater than 1% abundance (proportion) between the gut microbiota of CD progressors and  
645 healthy controls at age 1, 2.5, and 5 years old (taxa average relative abundance>1%).

646 **d.** Heat map showing the relative abundance of the top OTUs significantly different between CD  
647 progressors and healthy controls. Each column represents an individual participant and each row  
648 represents an OTU.

649 **e.** Empirical Bayes quasi-likelihood F-tests analysis for the comparisons of gut microbiota OTUs  
650 between CD progressors and healthy controls age 1, 2.5, and 5 years old. Frequency: number of  
651 OTUs. **a-e:** age 1: n=5/group; age 2.5: n=16/group; age 5: n=13/group.

652

653 **Figure 2. IgA-based Sorting and 16S sequencing revealed that Gut Microbiota were**  
654 **Differentially Coated by IgA.**

655 **a.** Principle component analysis (PCA) of sample similarity/dissimilarity between IgA+ and IgA-

656 microbiota in healthy control (left) or CD progressors (right).

657 **b.** Flow cytometry results for IgA coating of fecal bacteria from CD progressors and healthy  
658 controls at at age 1, 2.5 and 5. Indicated are mean±SEM. \*P<0.05 (Two way ANOVA).

659 **c.** Box plots showing the comparison between CD progressors and healthy controls : the alpha  
660 diversity measured by observed for IgA+/IgA- microbiota (upper panel), and the beta diversity  
661 measured by Bray–Curtis dissimilarity for IgA+/IgA- microbiota (lower panel) at ages 1, 2.5 ,  
662 and 5 years old. \*P<0.05.

663 **d.** NMDS analysis ordination of IgA+/IgA- microbiota similarity/dissimilarity between CD  
664 progressors and healthy controls at ages 1, 2.5, and 5 years old. Each circle represents an  
665 individual sample.

666 **e.** Average relative abundance of IgA+/IgA- bacterial phylum (left) or genera (right) of greater  
667 than 1% abundance (proportion) between the gut microbiota of CD progressors and healthy  
668 controls at ages 1, 2.5, and 5 years old (taxa average relative abundance>1%).

669 **f** Heat map showing the relative abundance of the top OTUs significantly different between  
670 IgA+/IgA- CD progressors and healthy controls (OTUs=51 based on p-value). Each column  
671 represents an individual participant and each raw represents an OTU.

672 **a-f:** age 1: n=5/group; age 2.5: n=16/group; age 5: n=13/group.

673

674 **Figure 3. The Enriched Microbial Pathways Altered in CD Progressors' Gut Microbiota**  
675 **are Significantly Different from Healthy Controls**

676 **a.** Heat map of PICRUSt predicted metabolic pathways of CD progressors and healthy controls.  
677 Each column represents an individual participant and each raw represents a predicted microbial  
678 functional pathway. Color code is shown on the figure.

679 **b.** Heat map of predicted metabolic pathways of CD progressors and healthy control obtained  
680 from PICRUST analysis. Each column represents an individual participant and each row  
681 represents a predicted microbial functional pathway. **a-b:** ages 1 year old : n=5/group); age 2.5  
682 years old: n=16/group; age 5 years old: n=13/group.

683

684 **Figure 4. CD Progressors Have a Distinct Plasma Metabolic Profile at Age 5**

685 **a.** Partial Least Square-Discrimination Analysis (PLS-DA) of plasma metabolites for CD  
686 progressors (n=10) and controls (n=9).

687 **b.** Volcano plot of plasma metabolites with fold change threshold ( $|\log_2(\text{FC})| > 1.2$ ) and t-tests  
688 threshold ( $-\log_{10}(p) > 0.1$ ). The red dots represent metabolites above the threshold. Fold changes  
689 are  $\log_2$  transformed and p values are  $\log_{10}$  transformed.

690 **c.** Box plots showing three most significantly increased metabolites in CD plasma.

691 **d.** Box plots showing the representative Clostridium XIVa bacteria abundance between CD  
692 progressors and healthy controls.

693 **e.** Heatmap showing 50 of the most altered metabolites

694 **f.** The Pathway Analysis (combined results from powerful pathway enrichment analysis with  
695 pathway topology analysis) identify the most altered metabolic pathways between

696 CD progressors and healthy controls. Pathway impact value (x) is calculated from pathway

697 topology analysis. p is the original p value calculated from the enrichment analysis and depicted

698 on a logarithmic scale.

699 **Figure S1. Box plots of representative bacteria that are differentially distributed in CD**

700 **progressors and healthy controls at a. Age 1 year old. b. Age 2.5 years old**

701 **and c. age 5 years old.**

702

703 **Figure S2. Flow Cytometry Analysis of IgA Coating of Fecal Bacterial from CD**

704 **Progressors and Health**

705 **a.** Schematic overview of IgA-based fecal bacteria separation combined with 16S rRNA gene  
706 sequencing (IgA-seq) for stool samples from CD progressors and healthy controls. MACS:  
707 Magnetic-activated cell separation

708 **b.** PCA plot of separation for all samples including presorting and postsorting (after IgA-seq)  
709 from both CD progressors and healthy controls in all age groups. Round dot: IgA coated and  
710 triangle: IgA uncoated. (Age 1: n=5; Age 2.5: n=16; Age 5: n=13).

711 **c.** Representative flow cytometry results of human fecal bacteria from healthy control and CD  
712 progressors with anti-IgA. (Age 1: n=5; Age 2.5: n=16; Age 5: n=13).

713 **d.** Flow cytometry results for IgA coating of fecal bacteria from CD progressors and healthy  
714 controls at at age 1, 2.5 and 5 excluding results from CD progressors with CD diagnosis before 5.  
715 (Age 1: n=5; Age 2.5: n=15 and 16; Age 5 n=9 and 13). Indicated are mean±SEM. \*P<0.05 (Two  
716 way ANOVA).

717

718 **Figure S3. IgA- Sequencing for CD Progressors and Healthy Controls.**

719 **a.** Empirical Bayes quasi-likelihood F-tests analysis for the comparisons of IgA coated and non  
720 coated gut microbiota OTUs in healthy controls (upper row) and CD progressors (lower row) at  
721 ages 1, 2.5, and 5. Frequency: number of OTUs.

722 **b.** Empirical Bayes quasi-likelihood F-tests analysis for the comparisons of IgA coated or non  
723 coated gut microbiota OTUs between CD progressors and healthy controls (upper row: age 2.5  
724 years old; lower row: age 5 years old).

725 **c.** Box plots showing representative bacteria in which abundances were similar in the gut  
726 microbiota (presorting samples) but differently targeted by IgA (upper row: age 2.5 years old;  
727 lower row: age 5 years old).

728 **a-c:** Age 1 : n=5/group; Age 2.5: n=16/group; age 5:n=13/group.

729

730 **Figure S4. PICRUSt predicted genes enriched in pre-IgA seq and post-IgA seq samples.**

731 **a.** Heat map of PICRUSt predicted microbial genes enriched in CD progressors or healthy  
732 controls Each column represents an individual participants and each row represents a predicted  
733 microbial gene. COLOR CODE?

734 **b.** Heat map of PICRUSt predicted microbial genes enriched in CD progressors or healthy  
735 controls after IgA sequencing. Each column represents an individual participants and each row  
736 represents a predicted microbial gene.

737 **a-b:** age 1: n=5/group; age 2.5: n=16/group; age 5: n=13/group.

738

739 **Figure S5. Box plots of representative metabolic pathways that are affected in CD**

740 **progressors. A. Age 1, B. Age 2.5 , C. Age 5**

741

742 **Figure S6. Heat map showing the correlation of most significantly altered top 20 OTUs and**

743 **most significantly altered 20 metabolic pathways at a. Age 1, b. Age 2.5 , c. Age 5. Color key**

744 **represents the Pearson correlation coefficient.**

745

**Figure 1 PRESORTING FIGURES: The gut microbiota of children developing celiac disease and healthy controls are different in the first 5 years of life**

**A.**

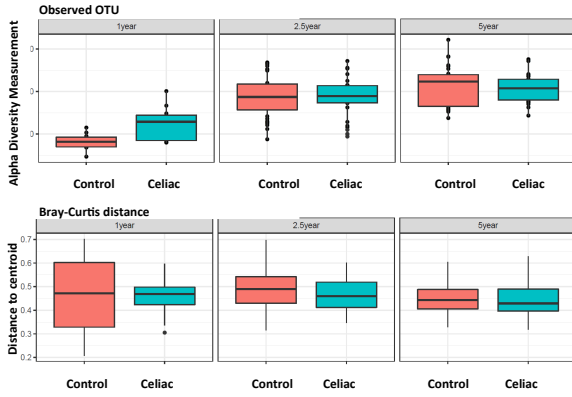

**B.**

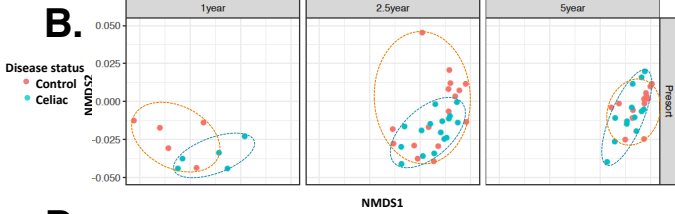

**D.**

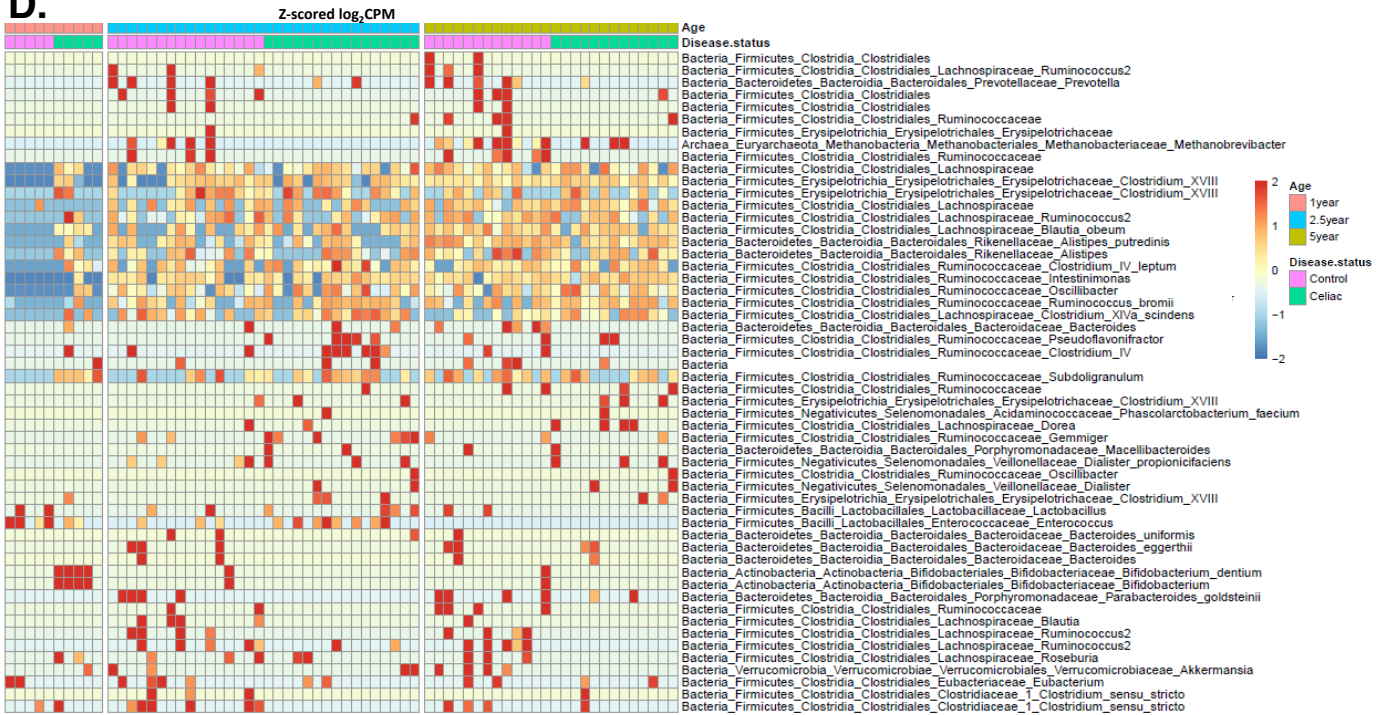

**E.**

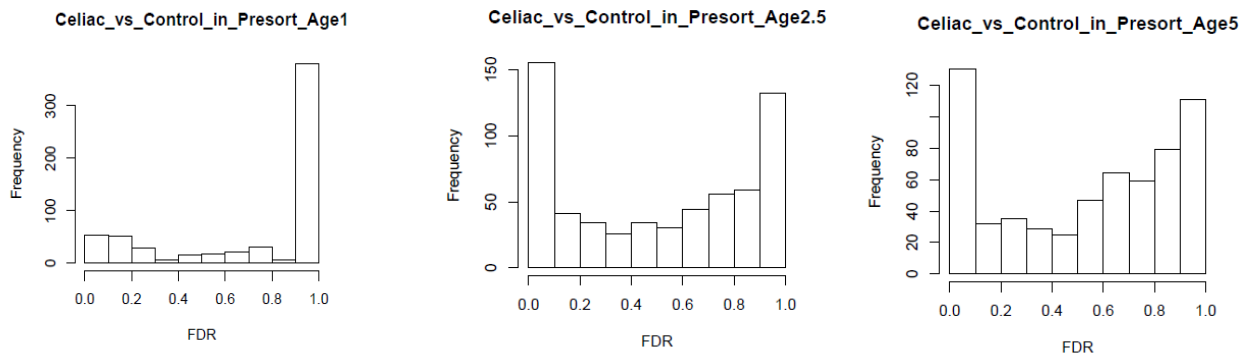

**C.**

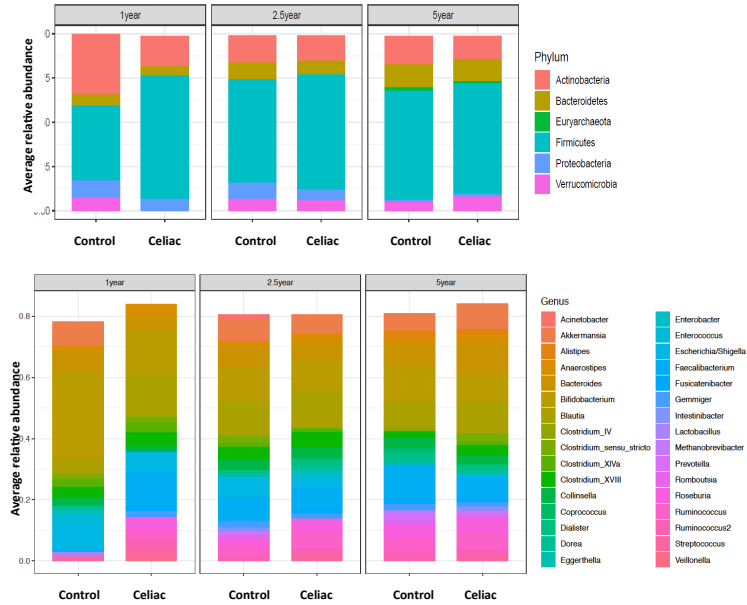

**Figure 2 POSTSORTING FIGURES: IgA Seq analysis differences**

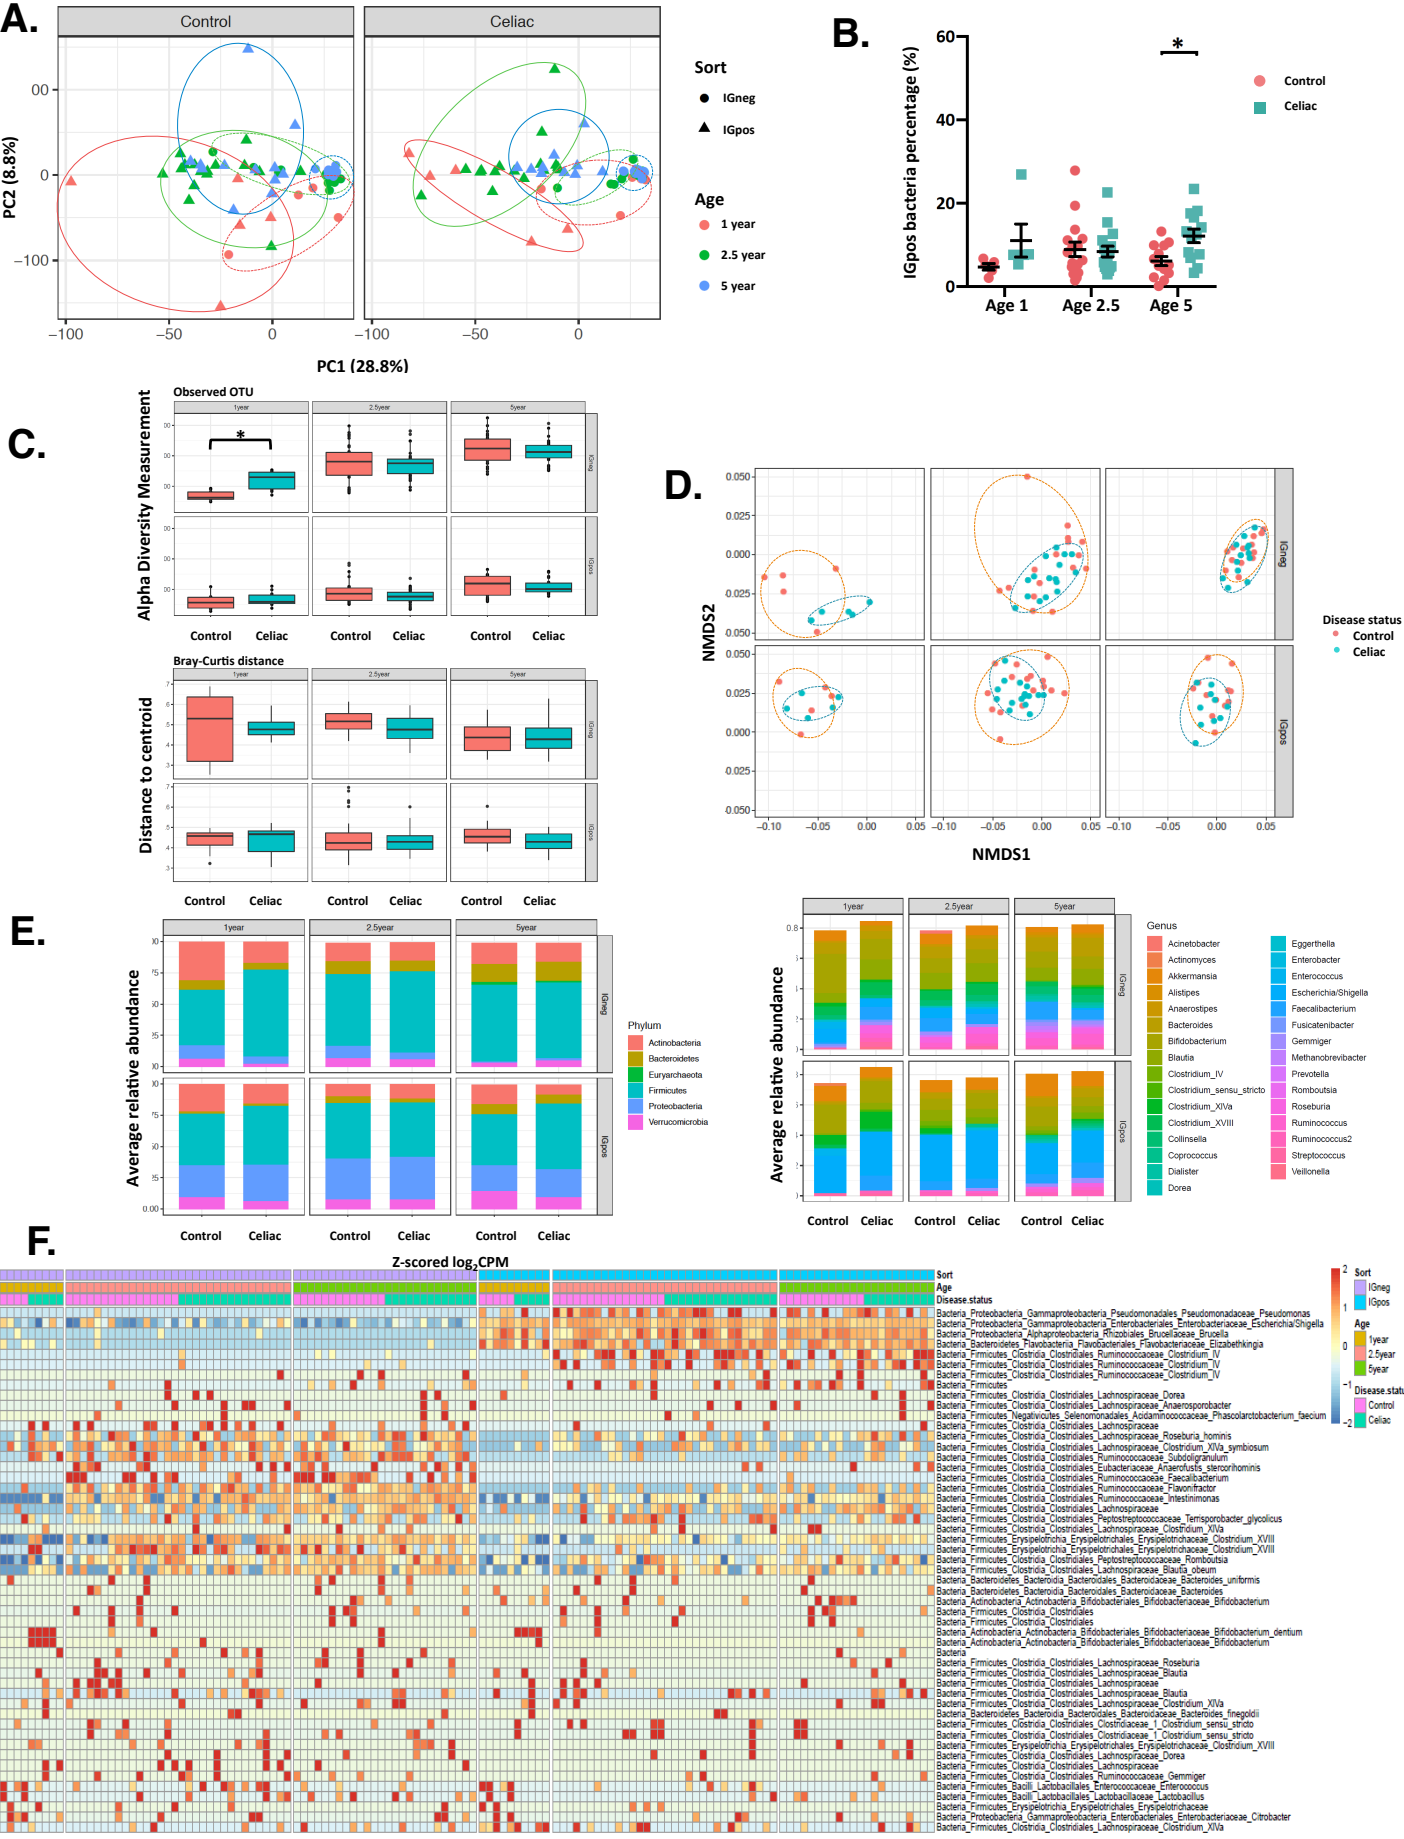

# Figure 3 PICRUST

**A.**

Z-scored Log<sub>2</sub> abundance

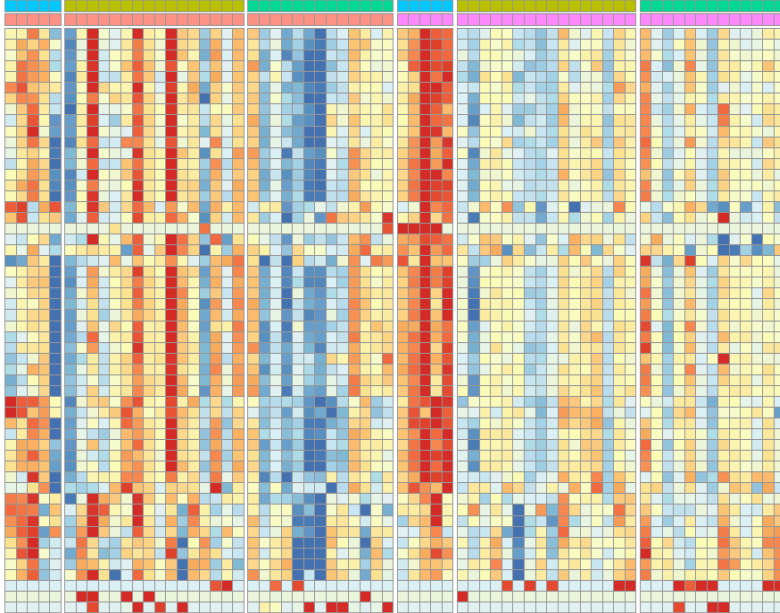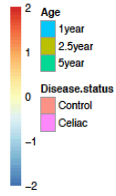

**B.**

Z-scored Log<sub>2</sub> abundance

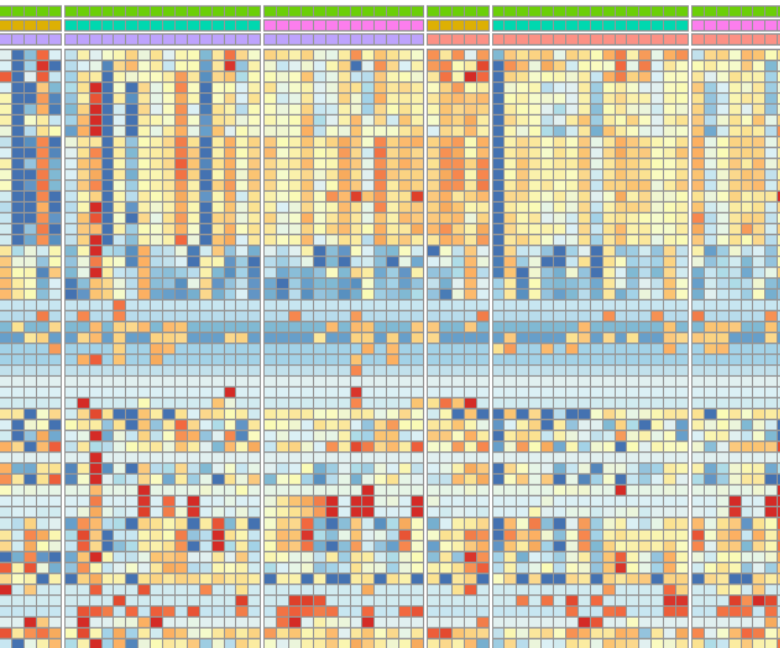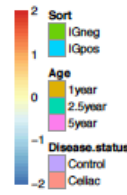



# Figure 4 Plasma Metabolomics

**A.**

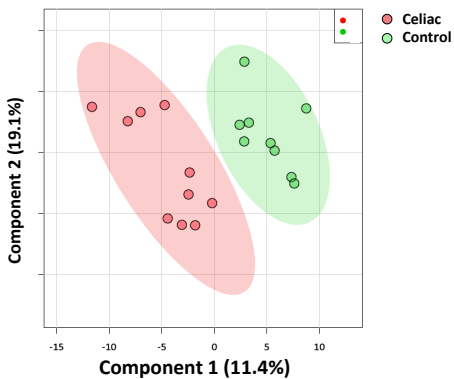

**B.**

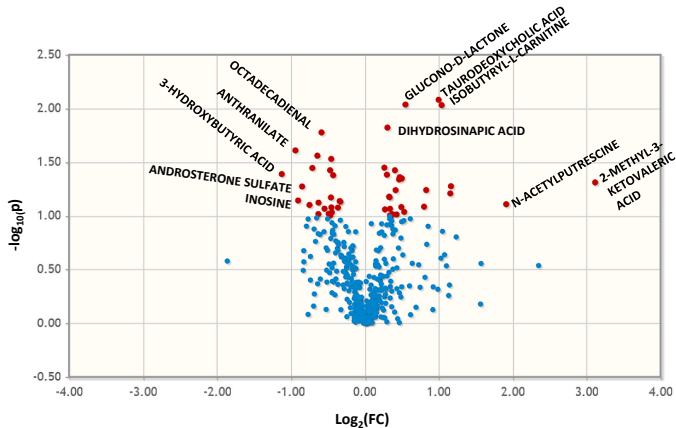

**C.**

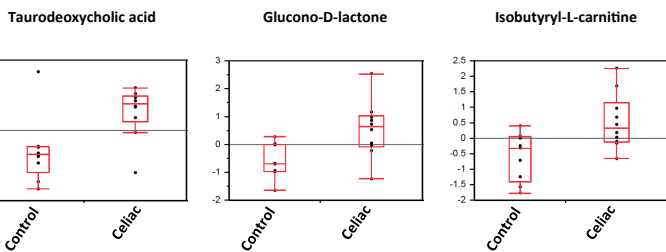

**D.**

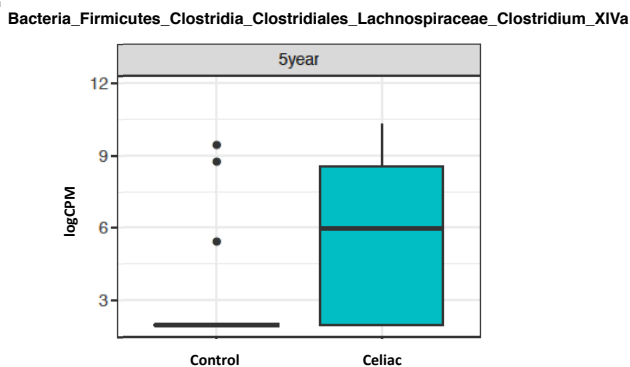

**E.**

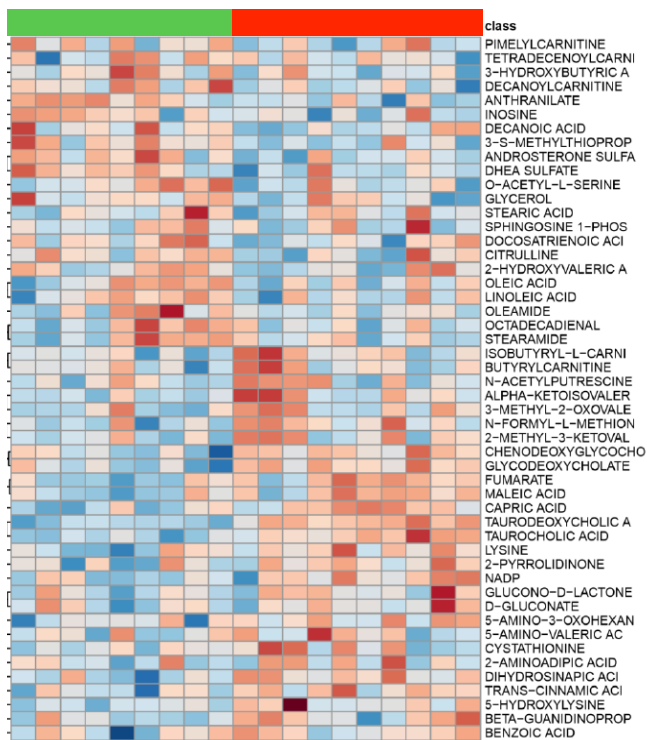

**F.**

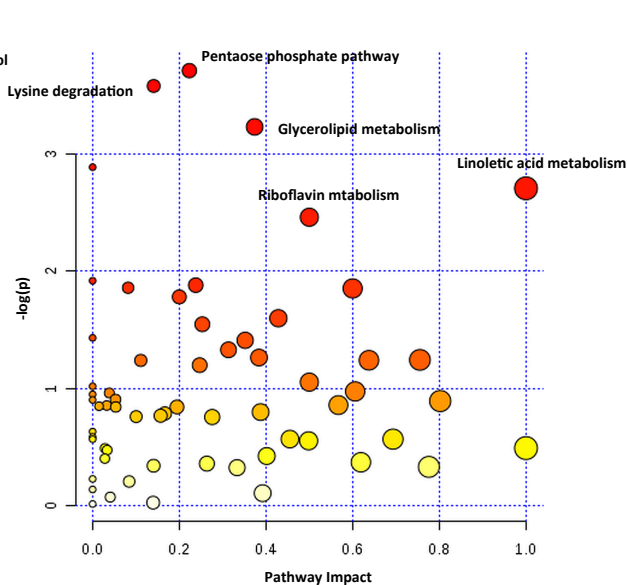

# Figure S1. Pre-sorting. Most Significant Differences for PRESORTING

## A. Age 1

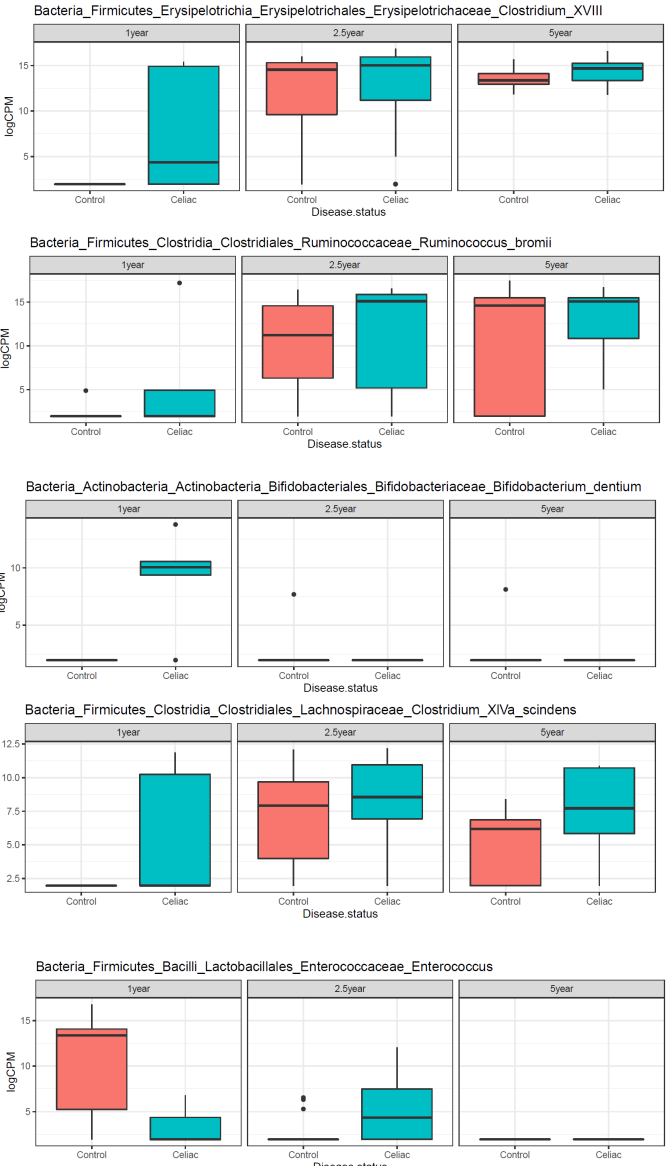

## B. Age 2.5

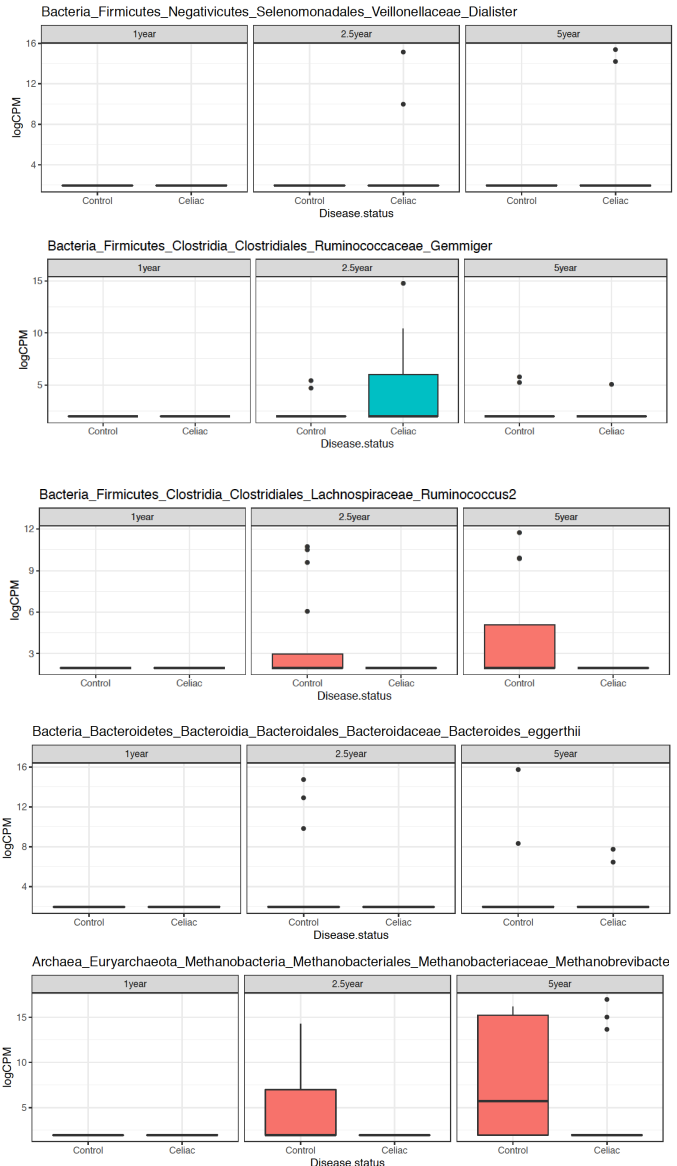

## C. Age 5

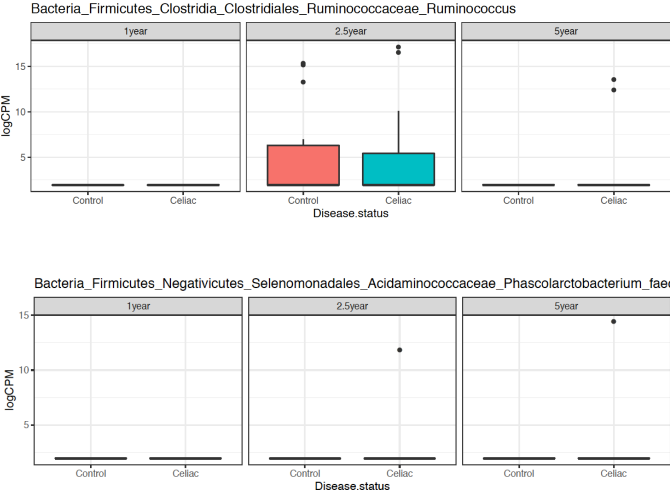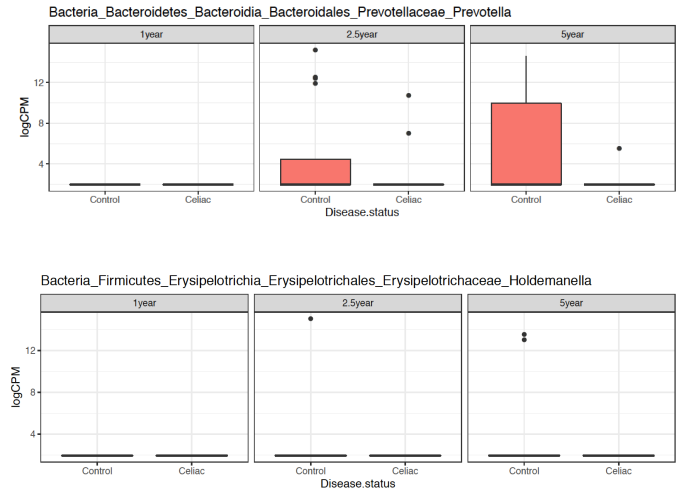

**Figure S2. Post-sorting. IgA+ bacteria percentage**

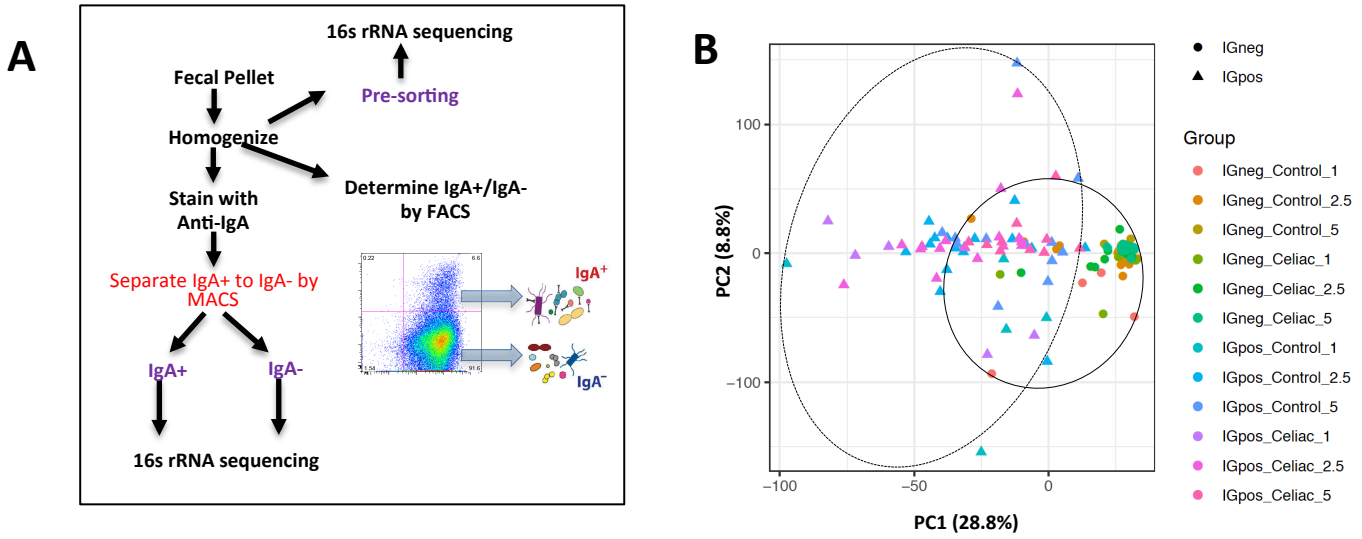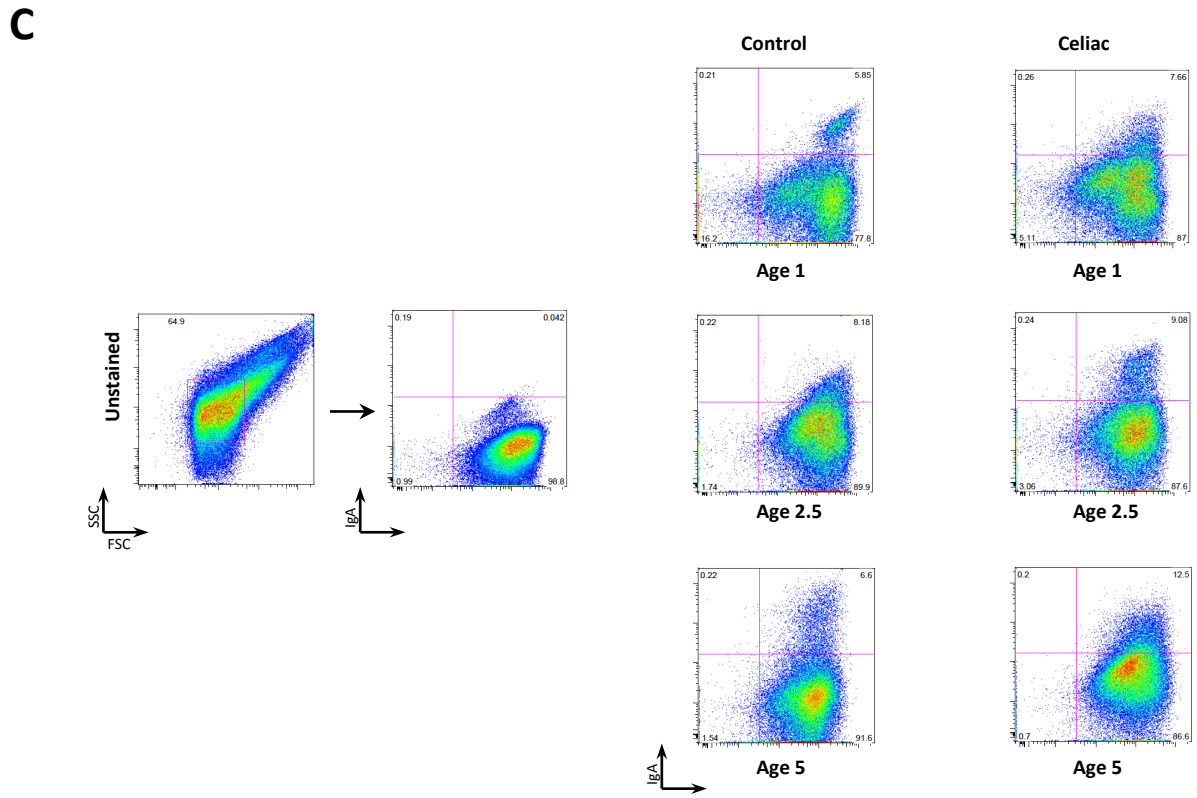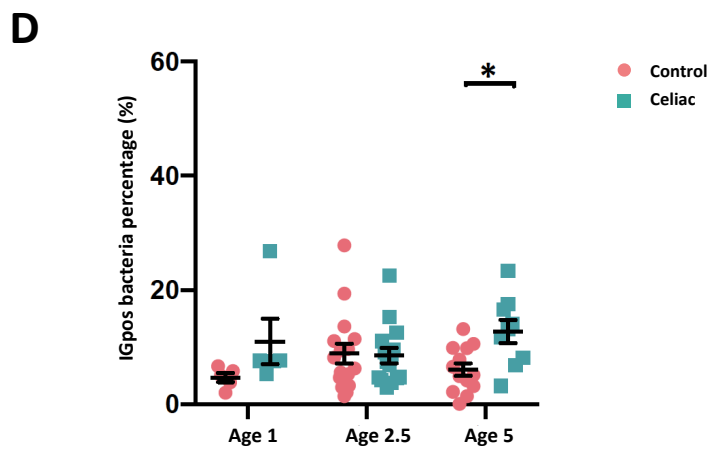

**Figure S3. Post-sorting. Most Significant Differences for post-sorting**

**A**

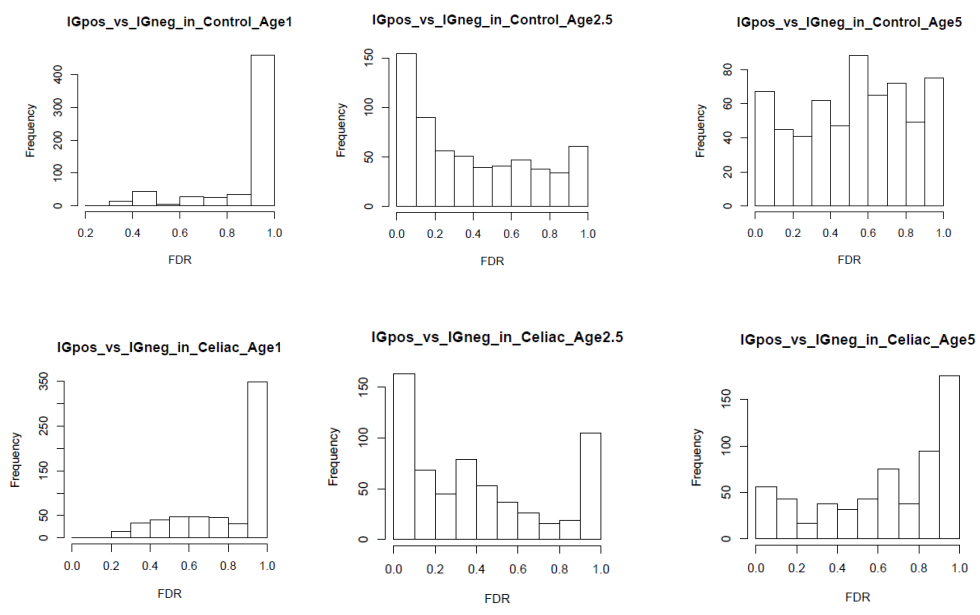

**B**

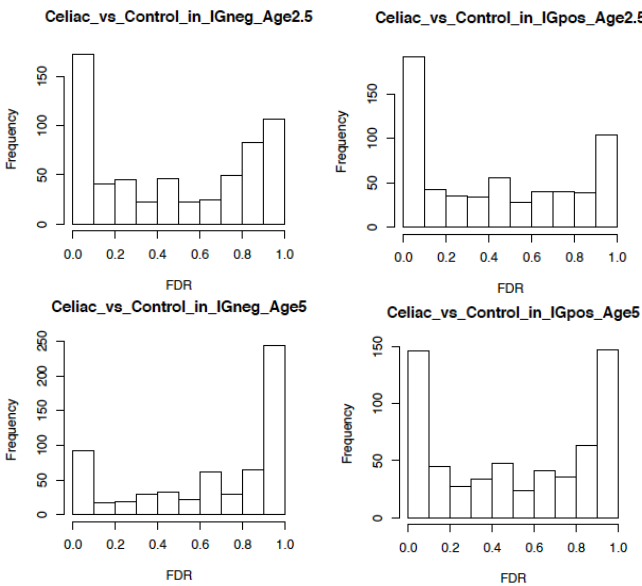

**C**

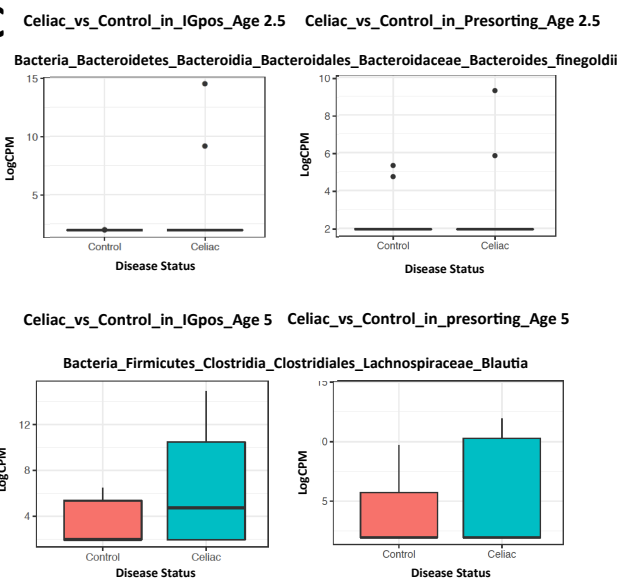

Figure S4. PICRUST genes heat map

A

Z-scored log<sub>2</sub>CPM

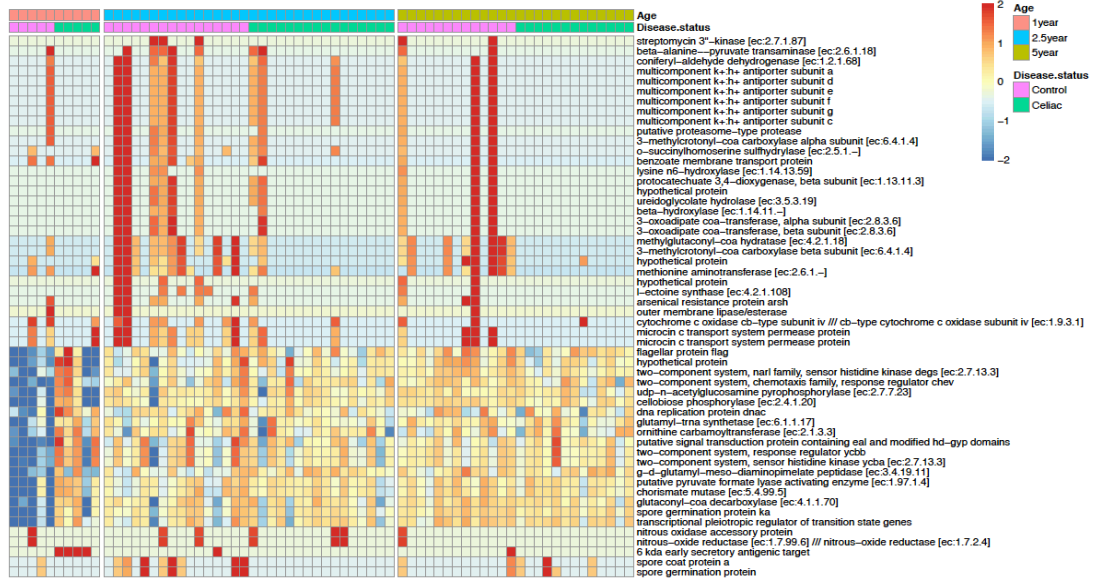

B

Z-scored log<sub>2</sub>CPM

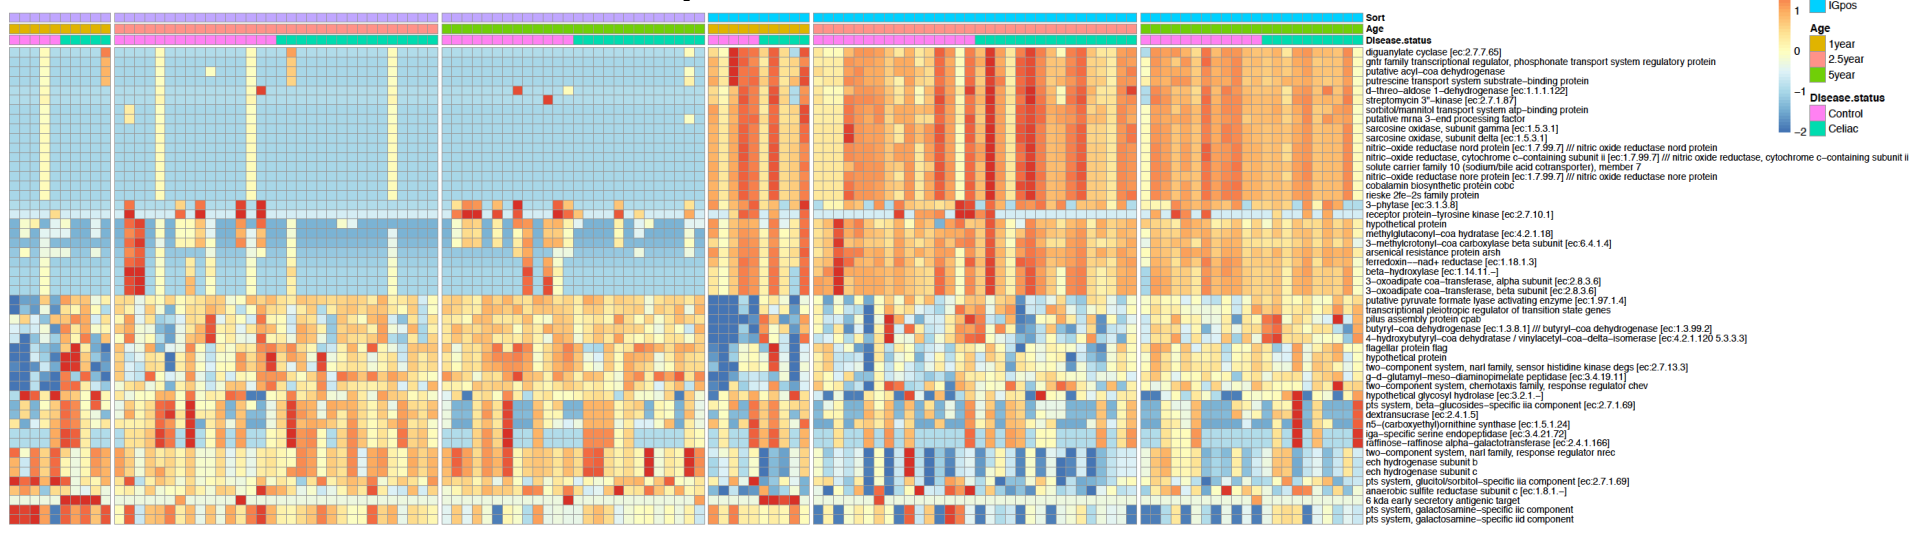

**Figure S5. PICRUST**

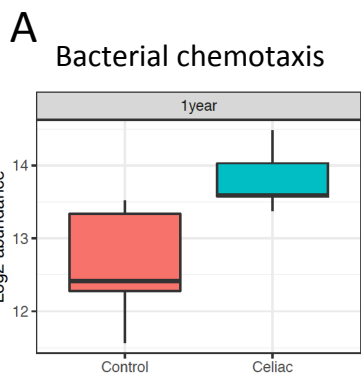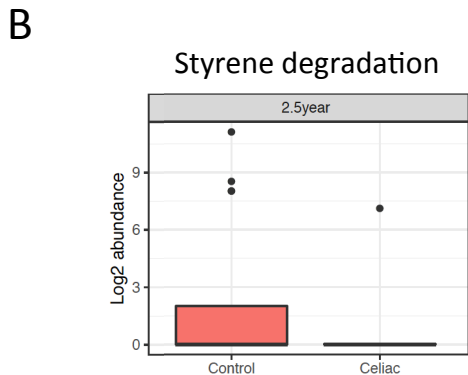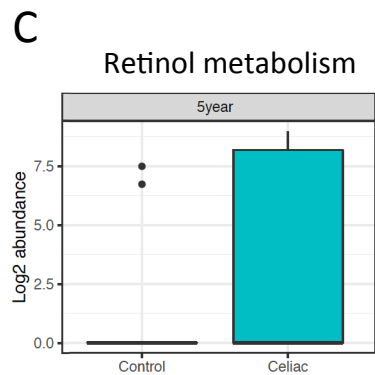

**Penicillin and cephalosporin biosynthesis**

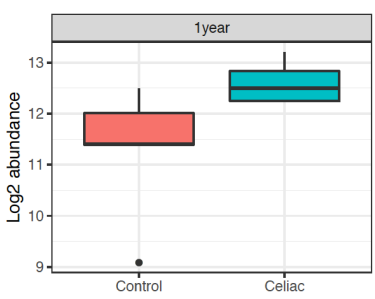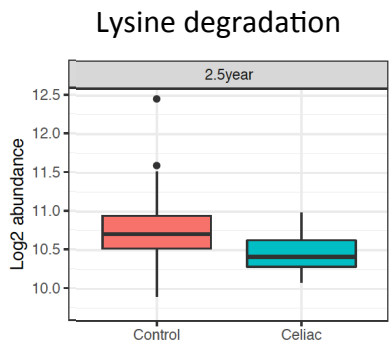

**Steroid hormone biosynthesis**

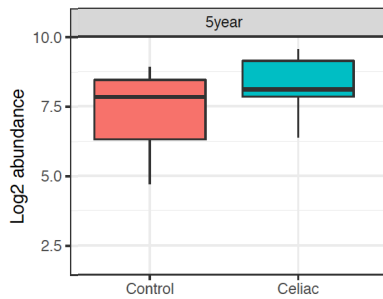

**Beta-Lactam resistance**

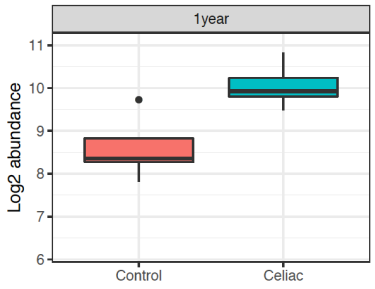

**Fatty acid metabolism**

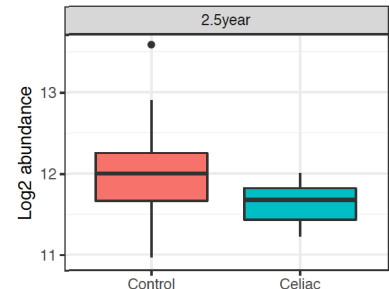

**Glycosaminoglycan degradation**

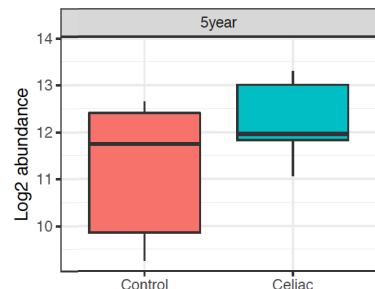

**Glutathione metabolism**

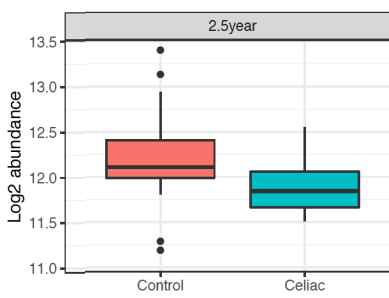

Figure S6. Pearson correlation analysis

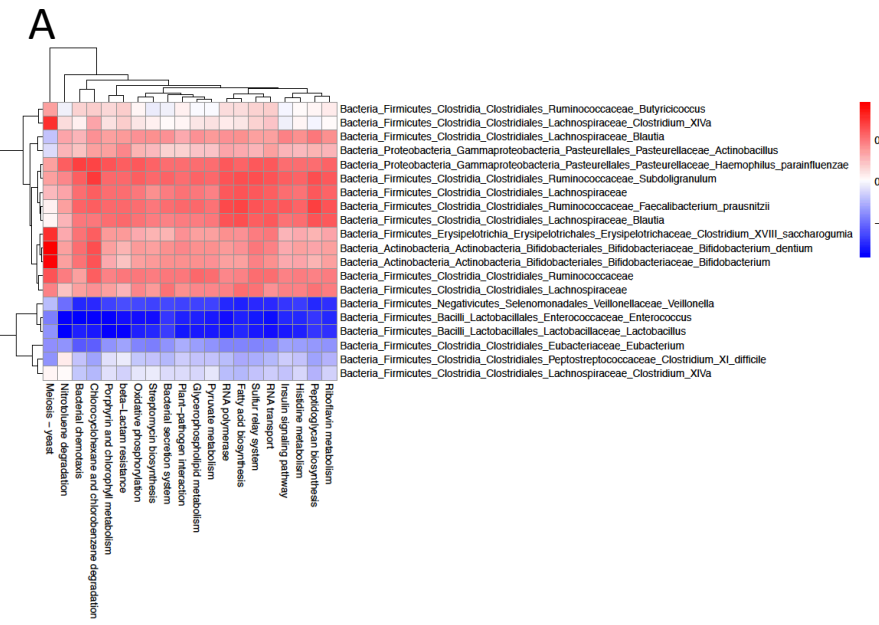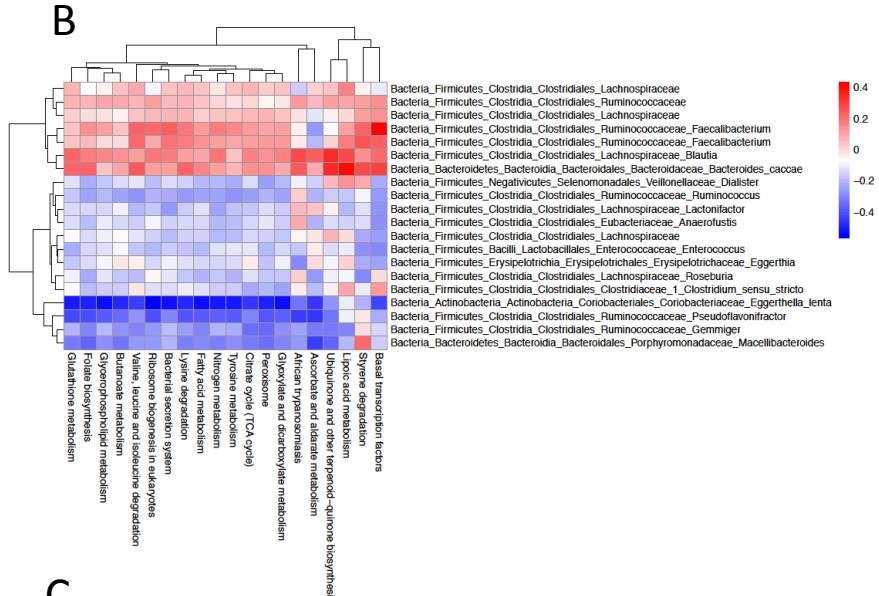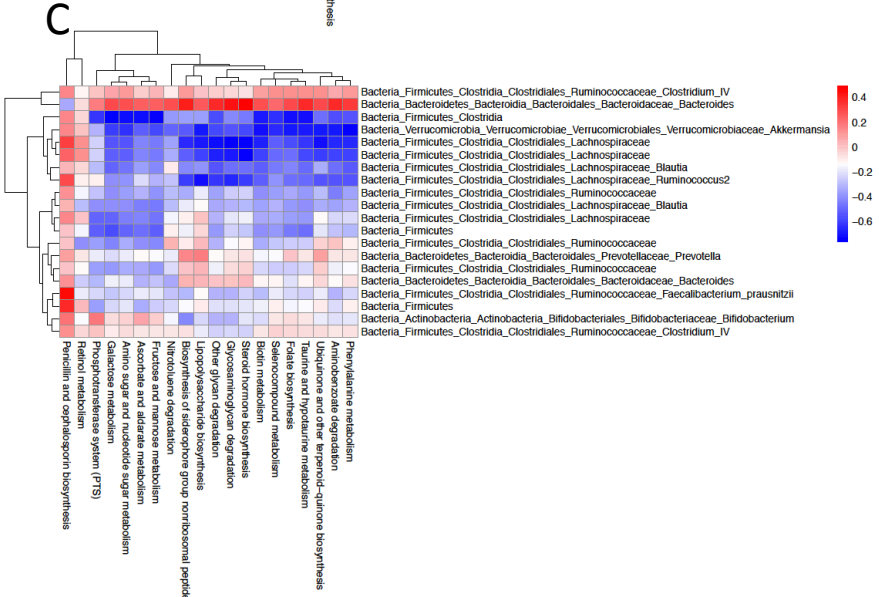

Source: https://www.biorxiv.org/content/biorxiv/early/2020/03/05/2020.02.29.971242.full.pdf
